# Supplementary material for: Identification of Habitat-Specific Biomes of Aquatic Fungal Communities Using a Comprehensive Nearly Full-Length 18S rRNA Dataset Enriched with Contextual Data
Source: PubMed Central journal article supplement (PMC4520555; doi:10.1371/journal.pone.0134377), 2015-07-30

**Supplementary Figure S1: Maximum Likelihood tree of fungal 18S rRNA gene sequences.** The tree was rooted with sequences of eight species of the *Choanoflagellates*. Branch support was estimated with bootstrap method. Only support values  $\geq 50\%$  are indicated. Sequences derived from the KSMP-Kiel culture collection are printed in bold. Color code, contextual data: colored background of fungal taxa, habitat occurrence of fungal taxa; colored lines beside sequence full name, geographical origin of fungal taxa. Subcategories of the geographical origin displayed as letter to the right of the colored stripe. \*, wrong full name annotation of sequence.

Figure 1: Subsection of *Tremellomycetes*

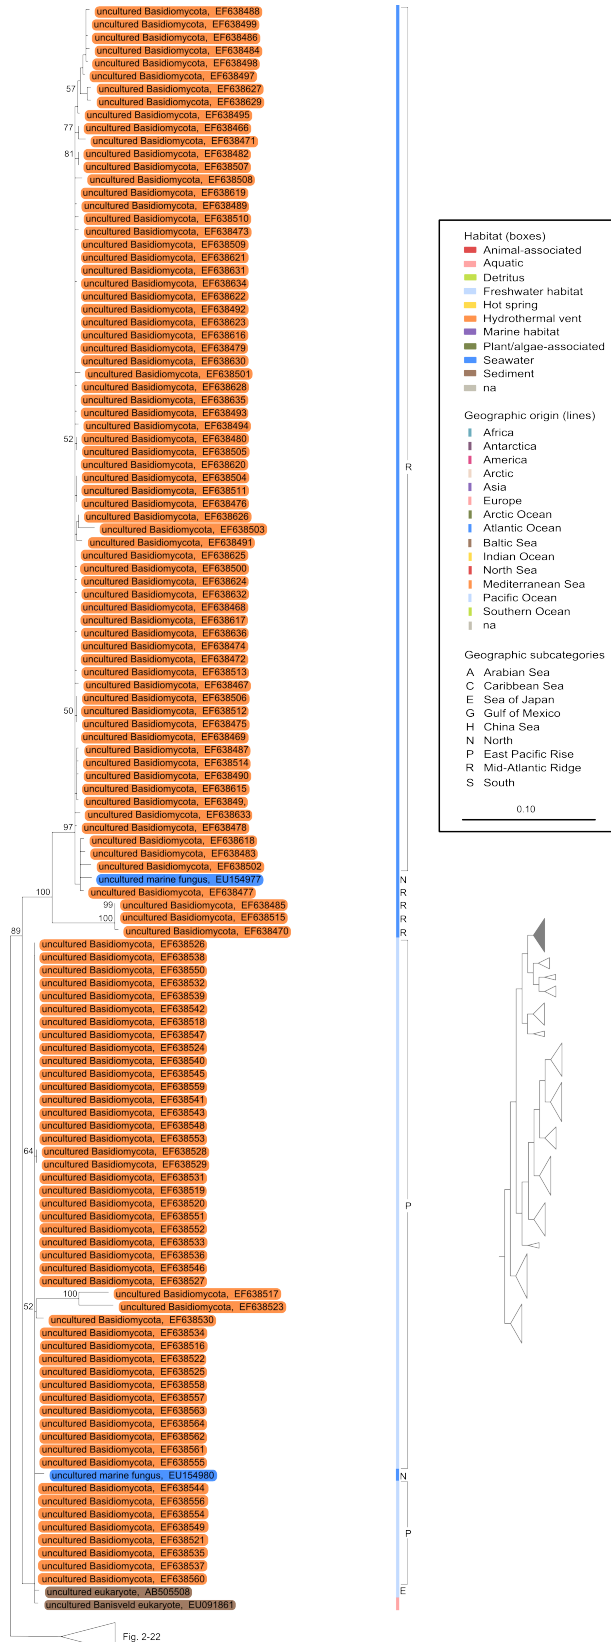

Figure 2: Subsection of *Agaricomycotina*

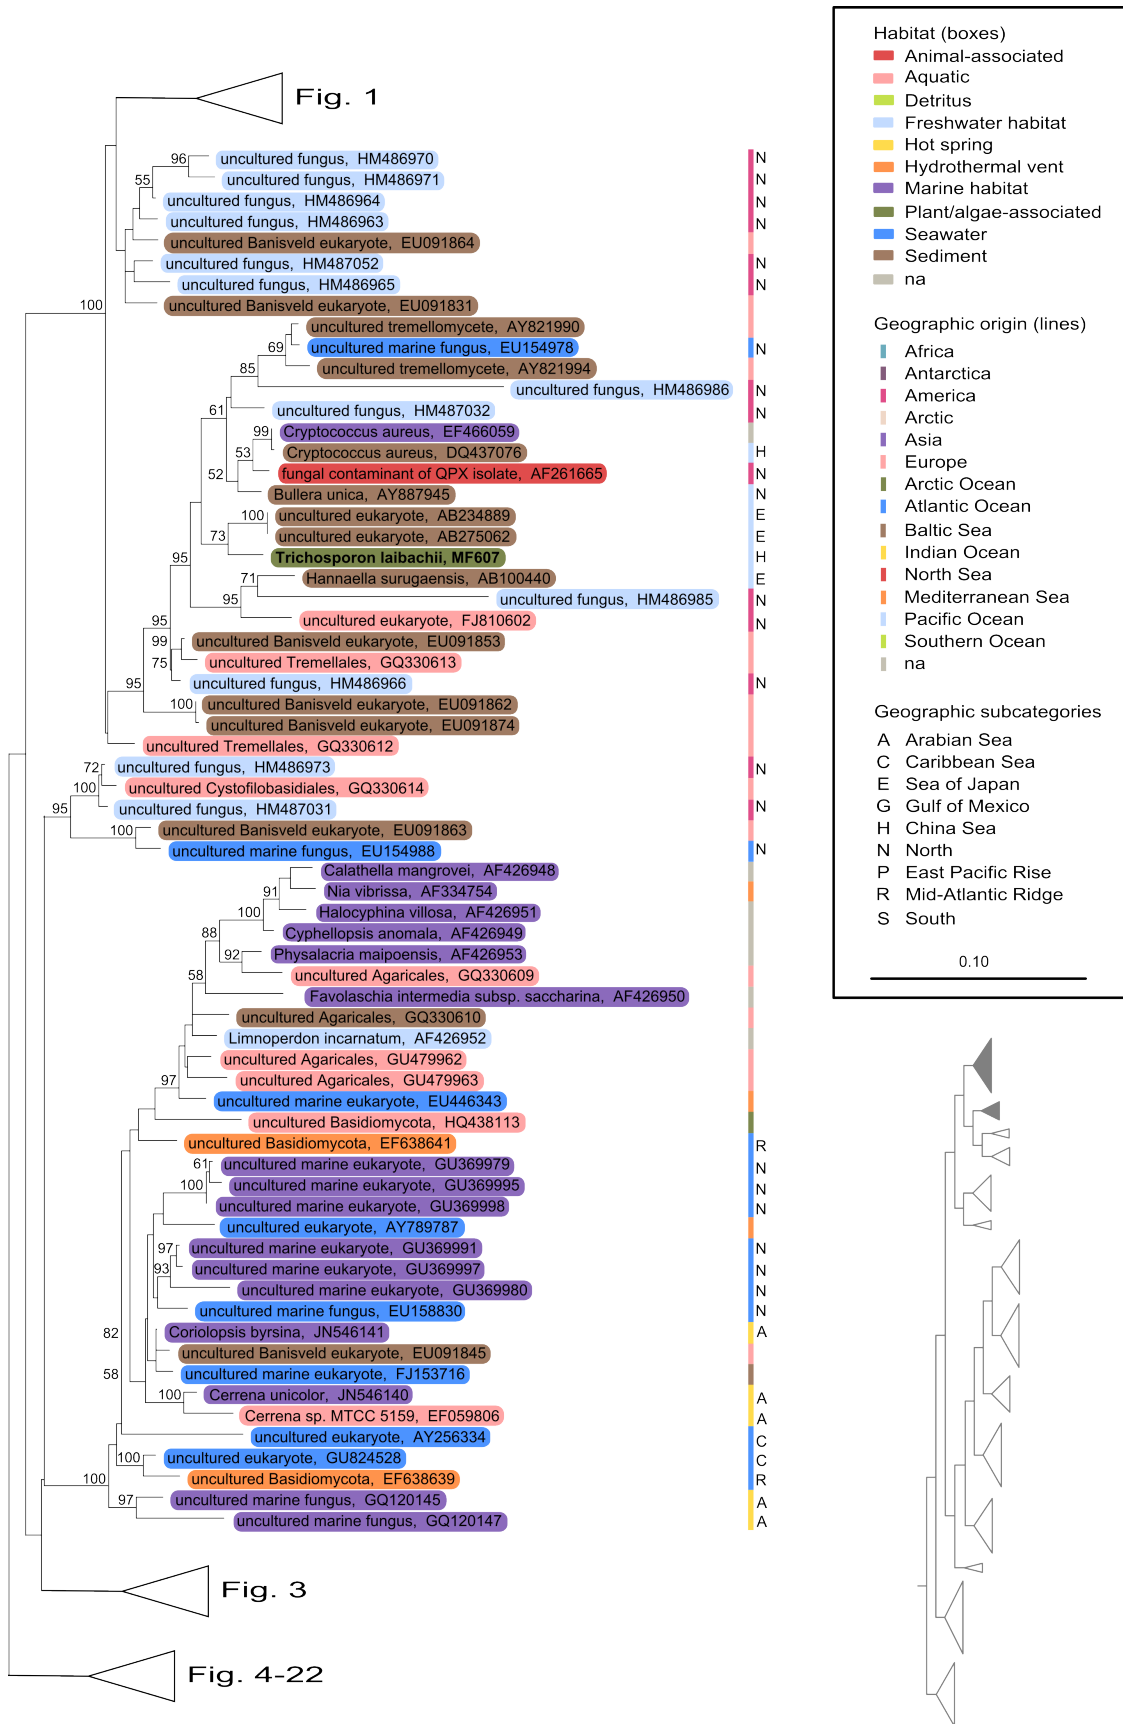

Figure 3: Subsection of *Pucciniomycotina*

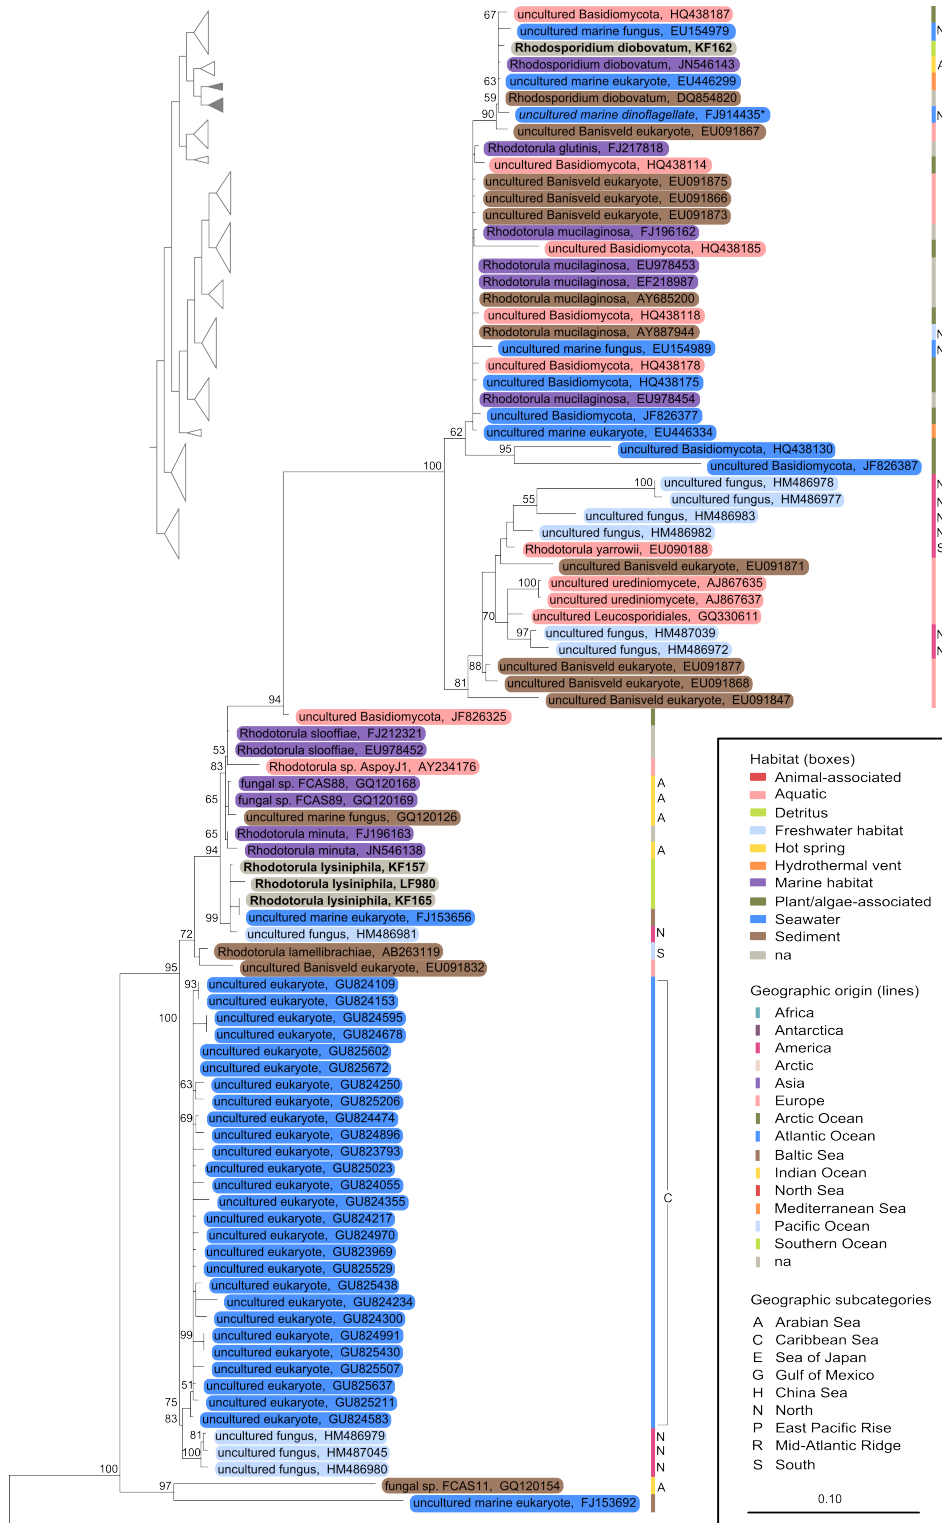

Fig. 1,2,4-22

Figure 4: Subsection of *Exobasidiomycetes*

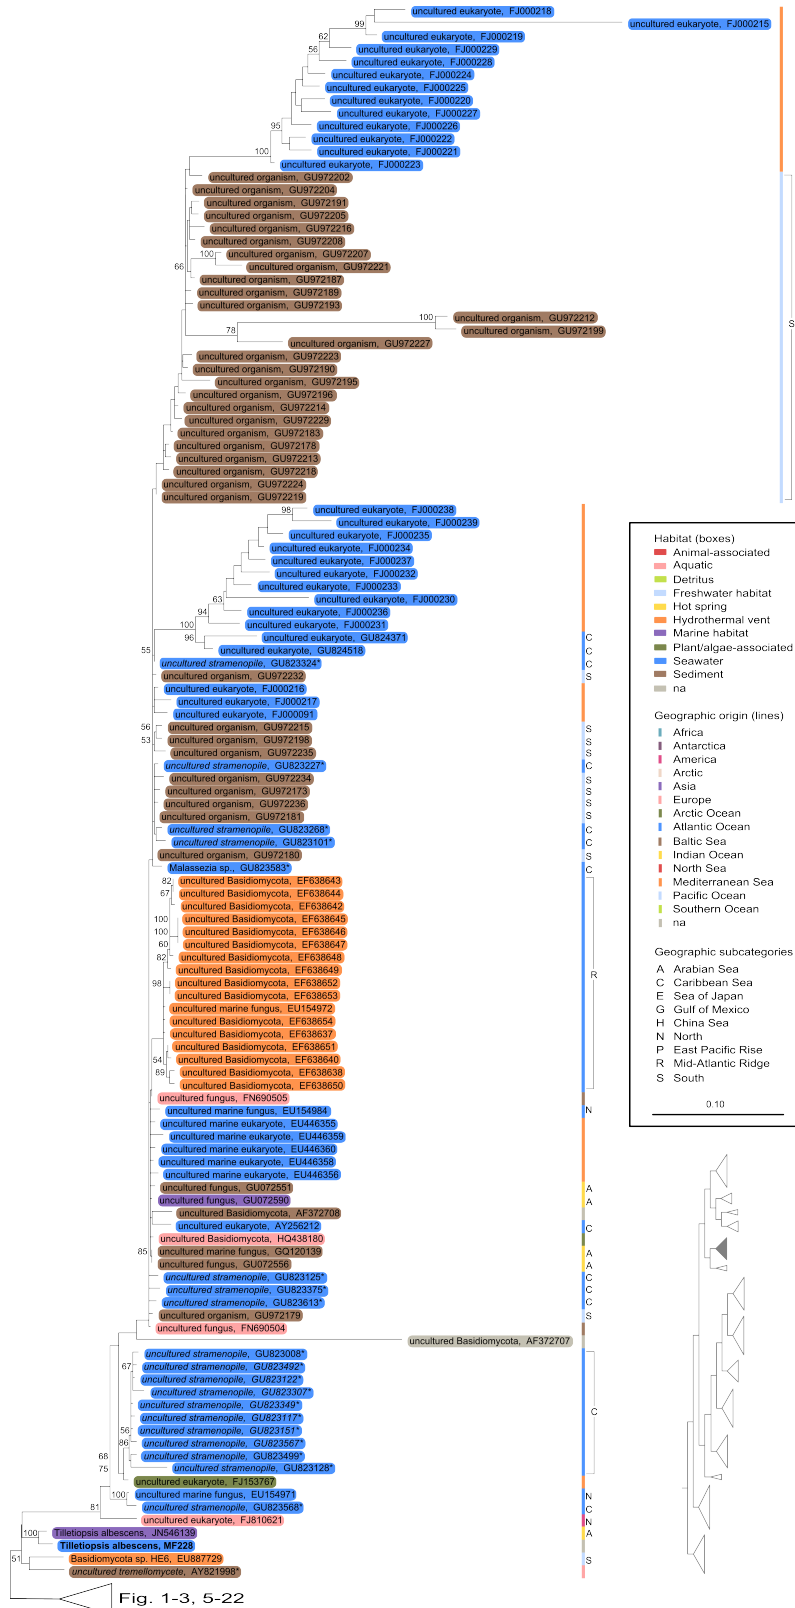

Figure 5: Subsection of *Ustilaginomycetes*

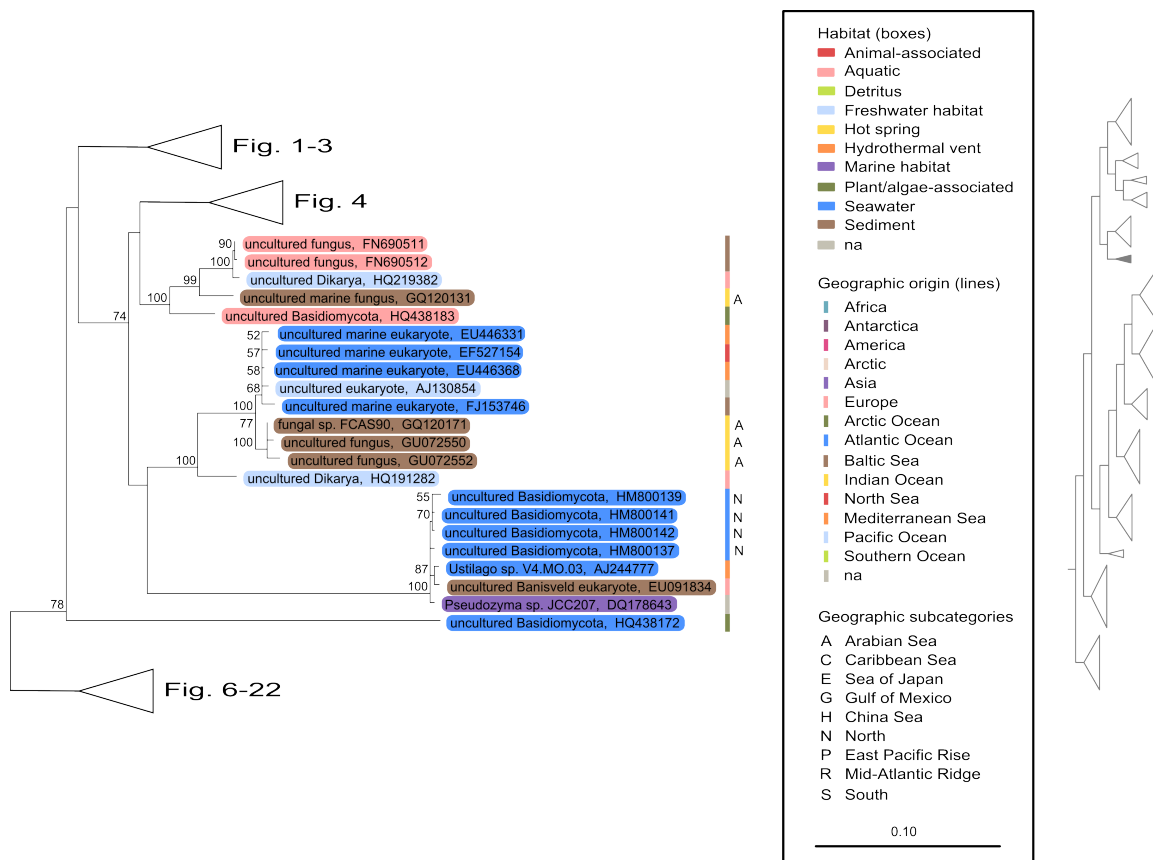

Figure 6: Subsection of *Eurotiomycetes*

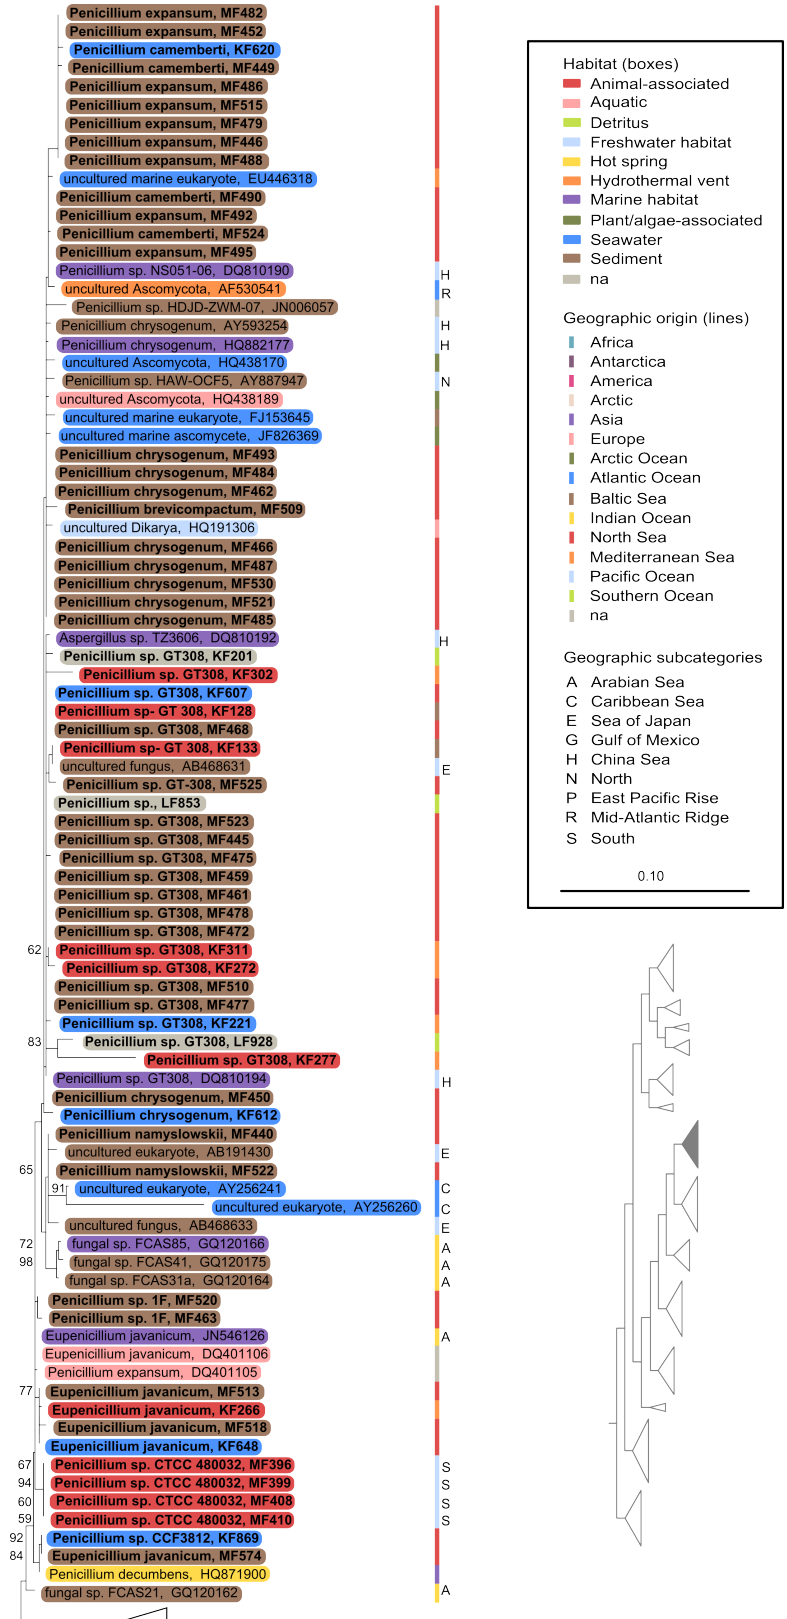

Figure 7: Subsection of *Eurotiomycetes*

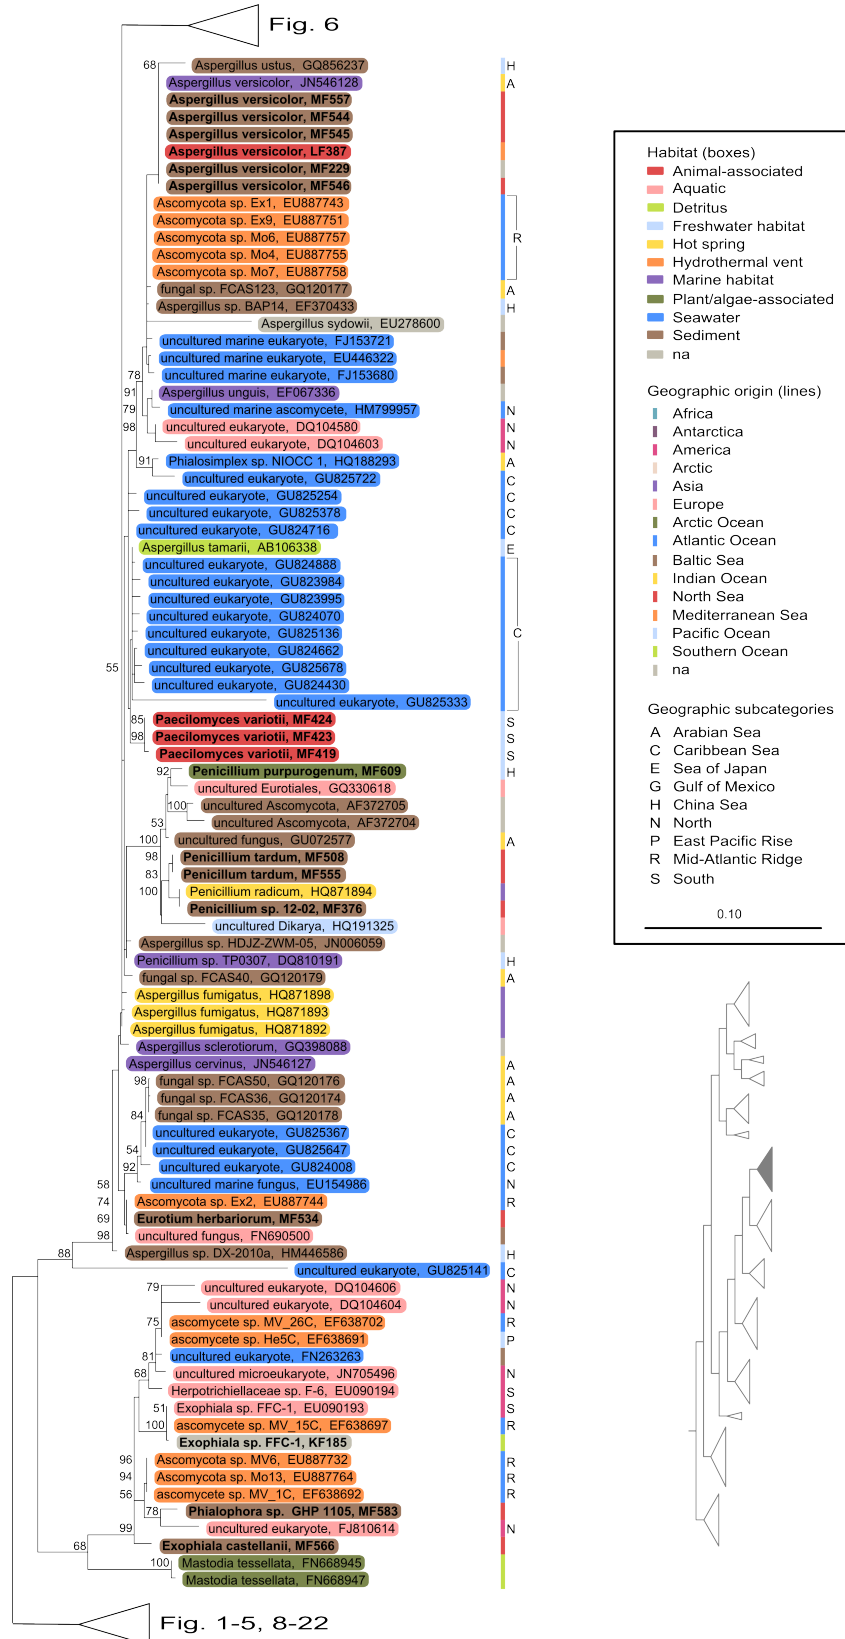



Figure 8: Subsection of *Dothideomycetes*

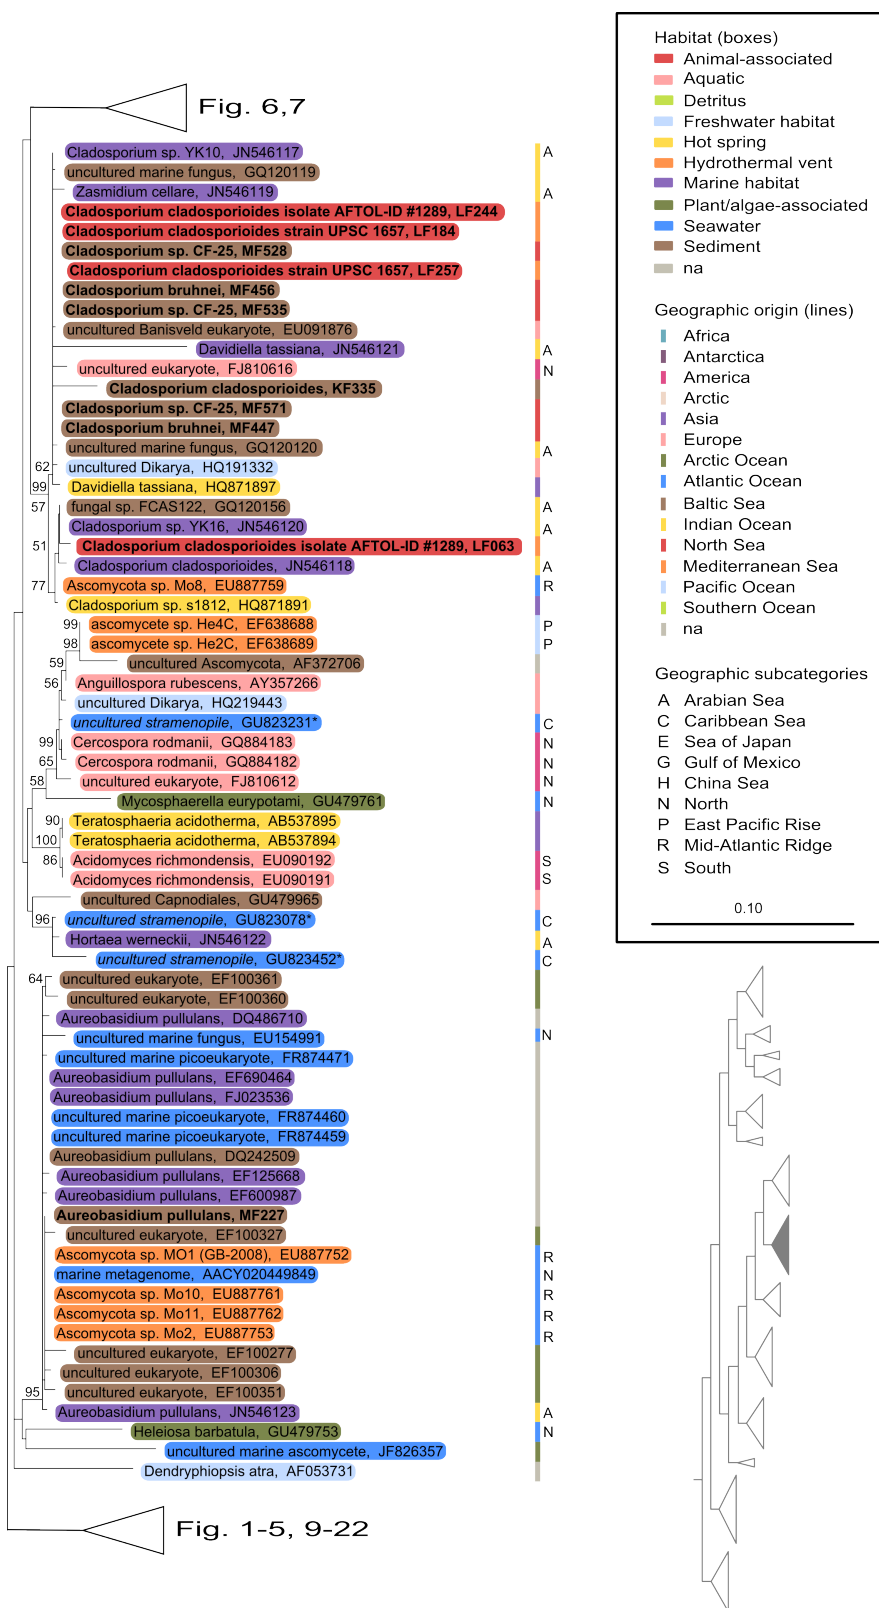

Figure 9: Subsection of *Dothideomycetes*

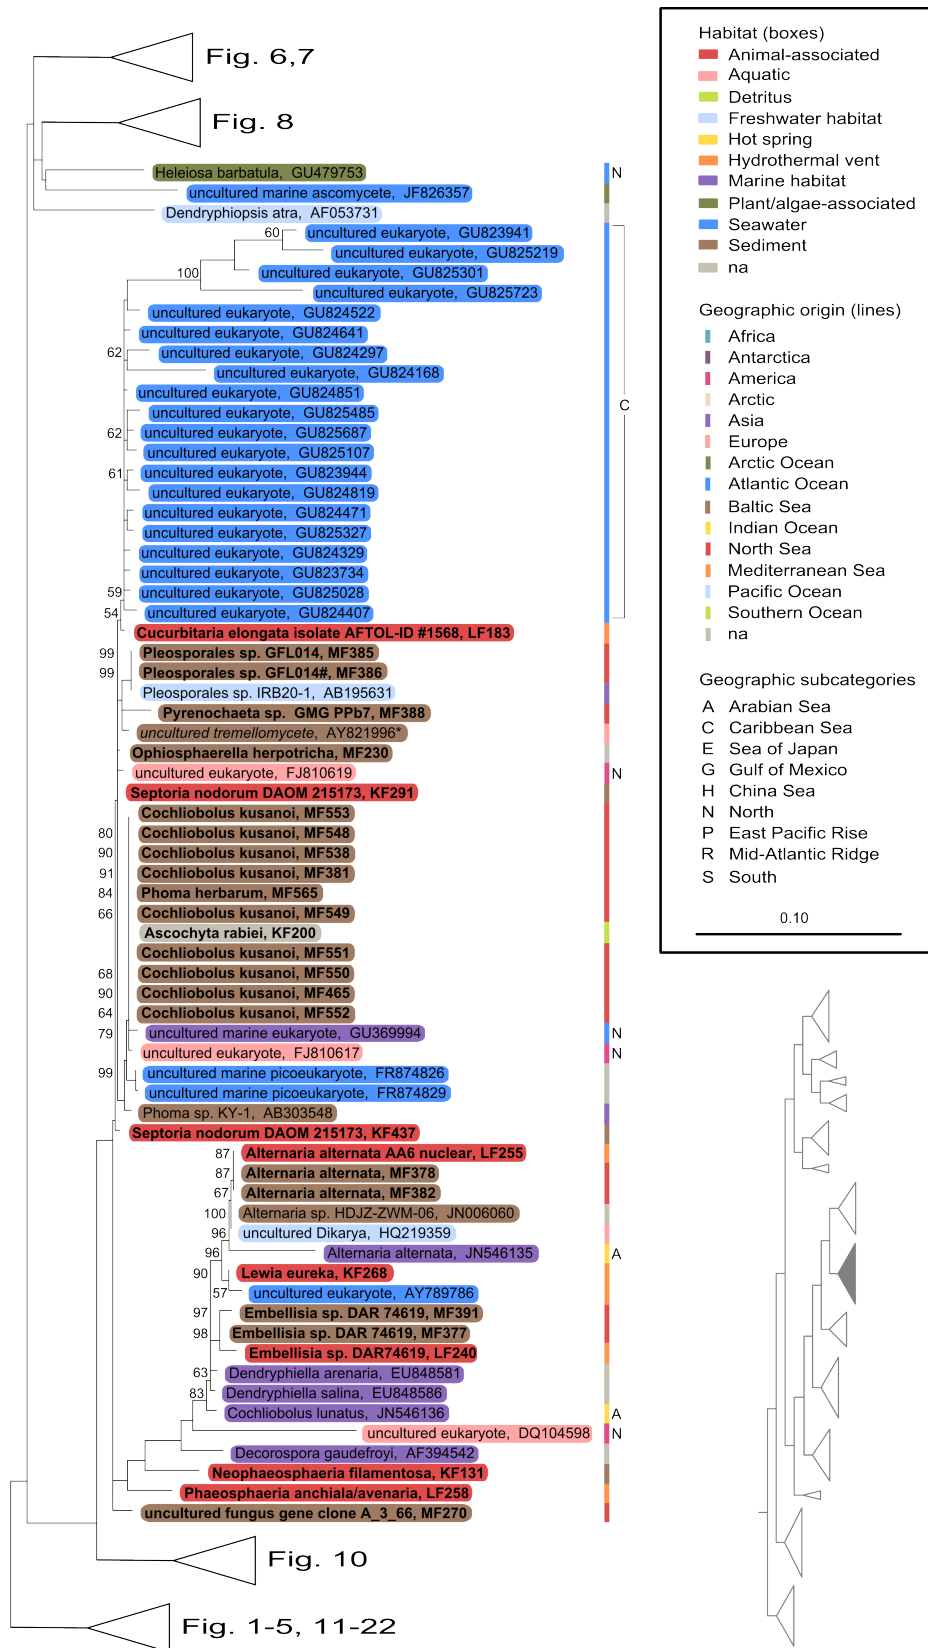

Figure 10: Subsection of *Dothideomycetes*

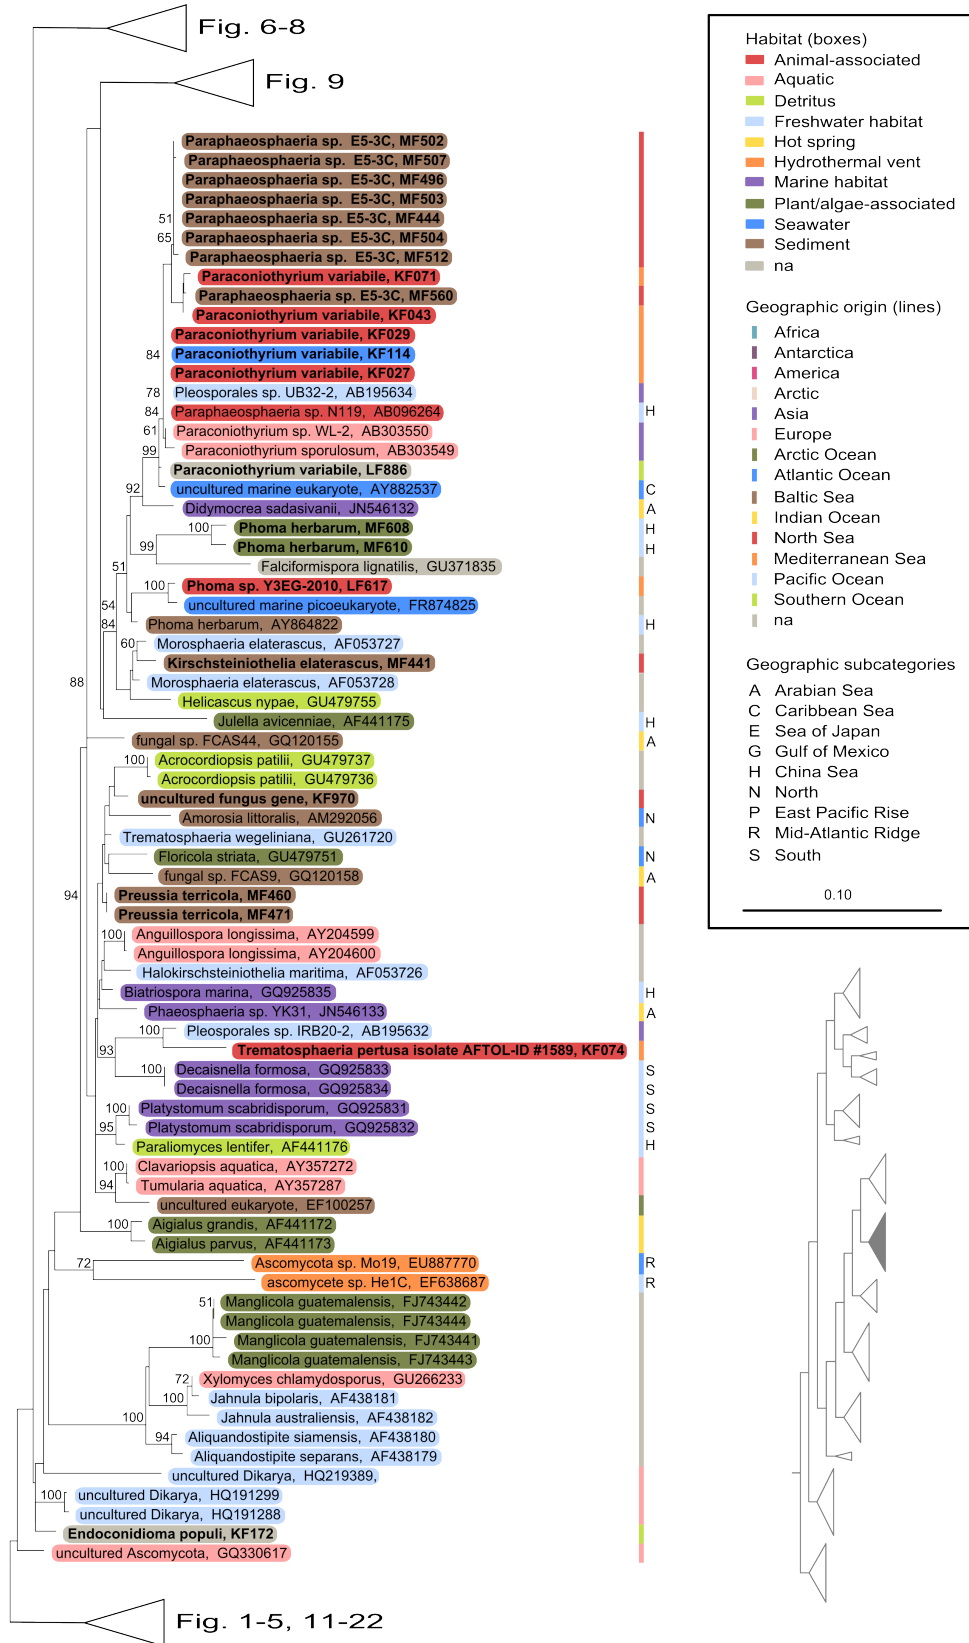

Figure 11: Subsection of *Leotiomyces*

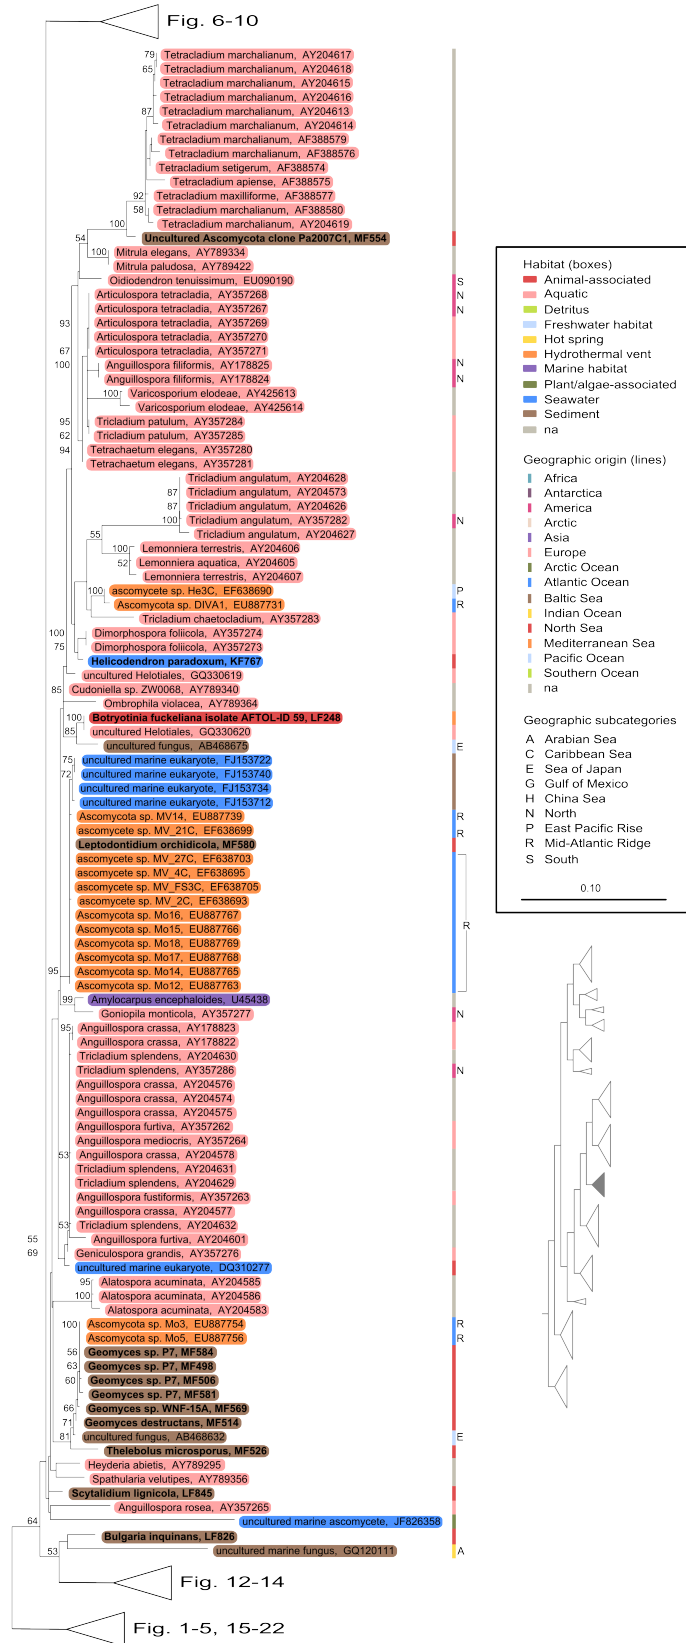

Figure 12: Subsection of *Sordariomycetes*

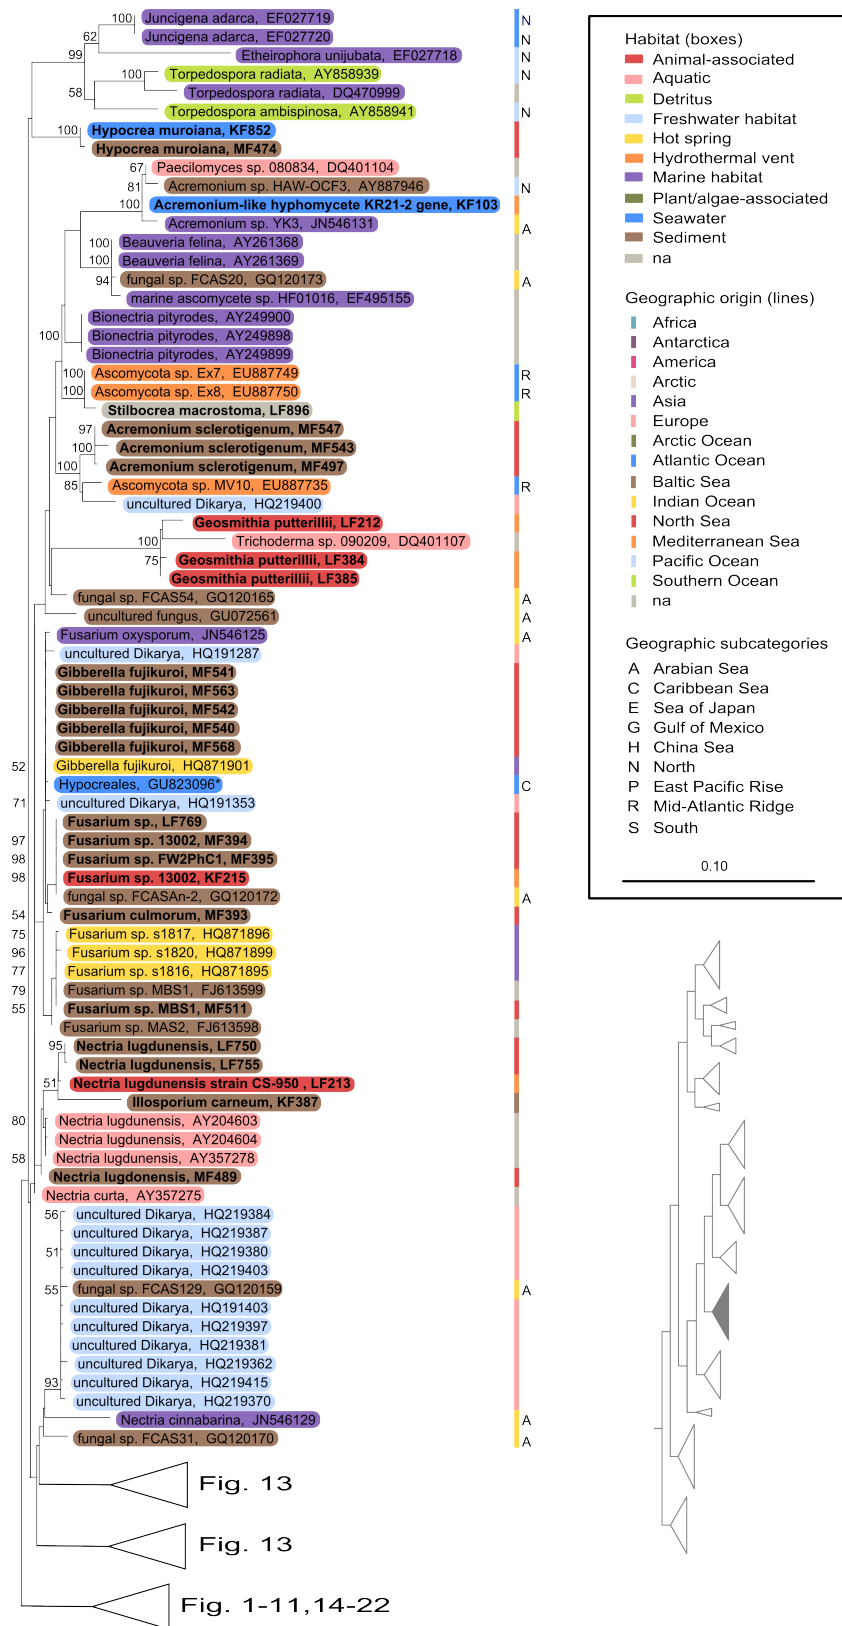

Figure 13: Subsection of *Sordariomycetes*

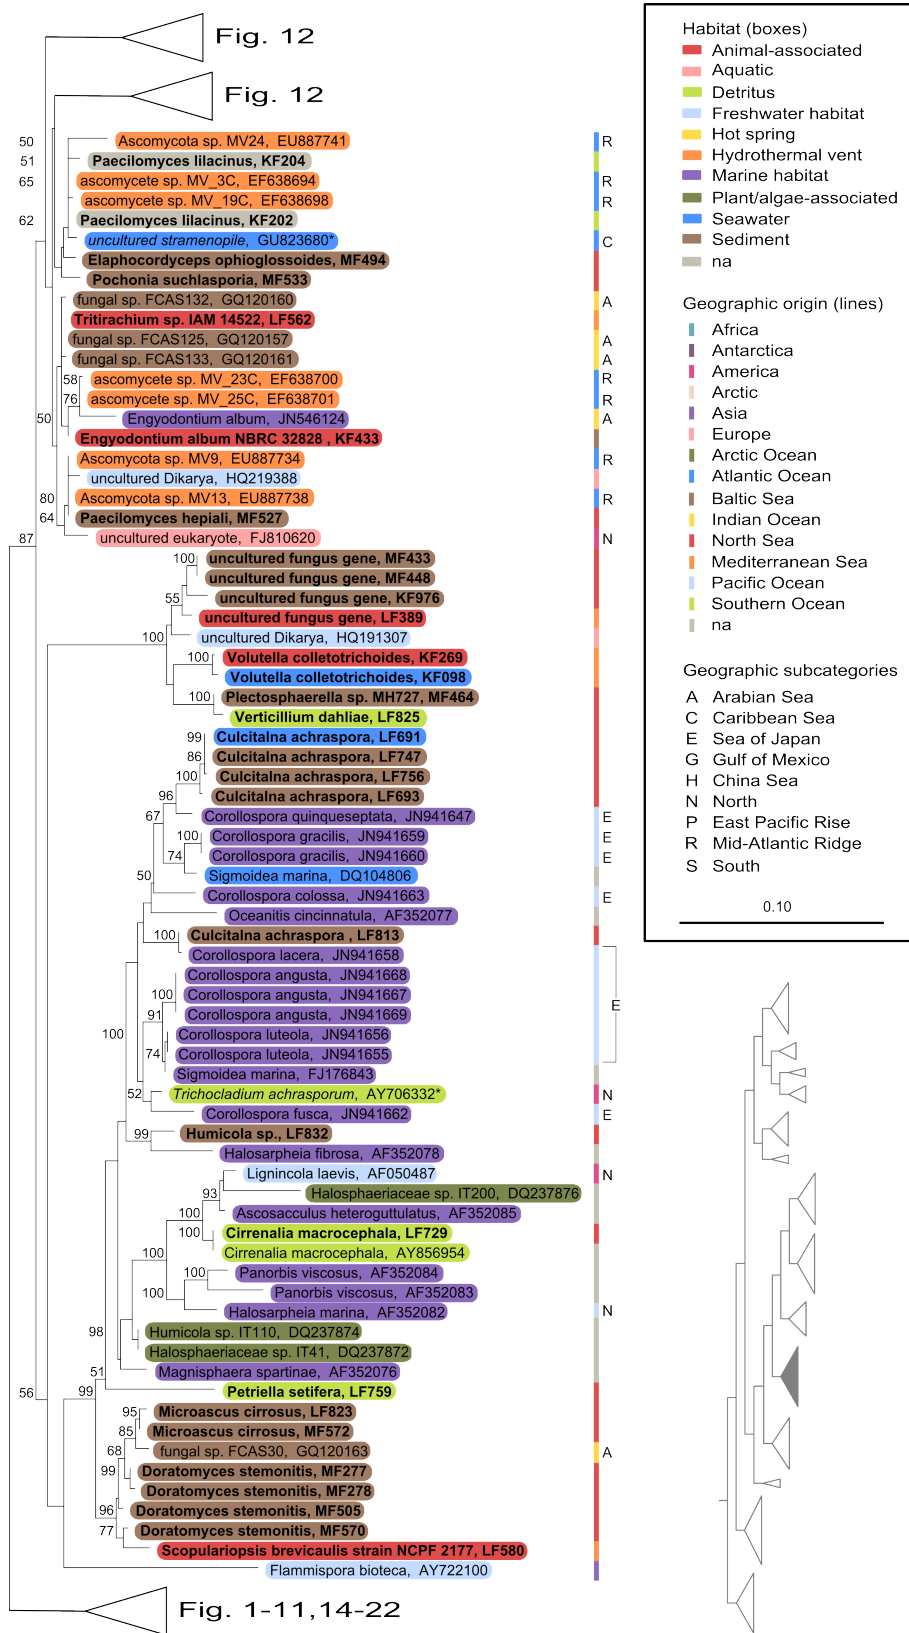

Figure 14: Subsection of *Sordariomycetes*

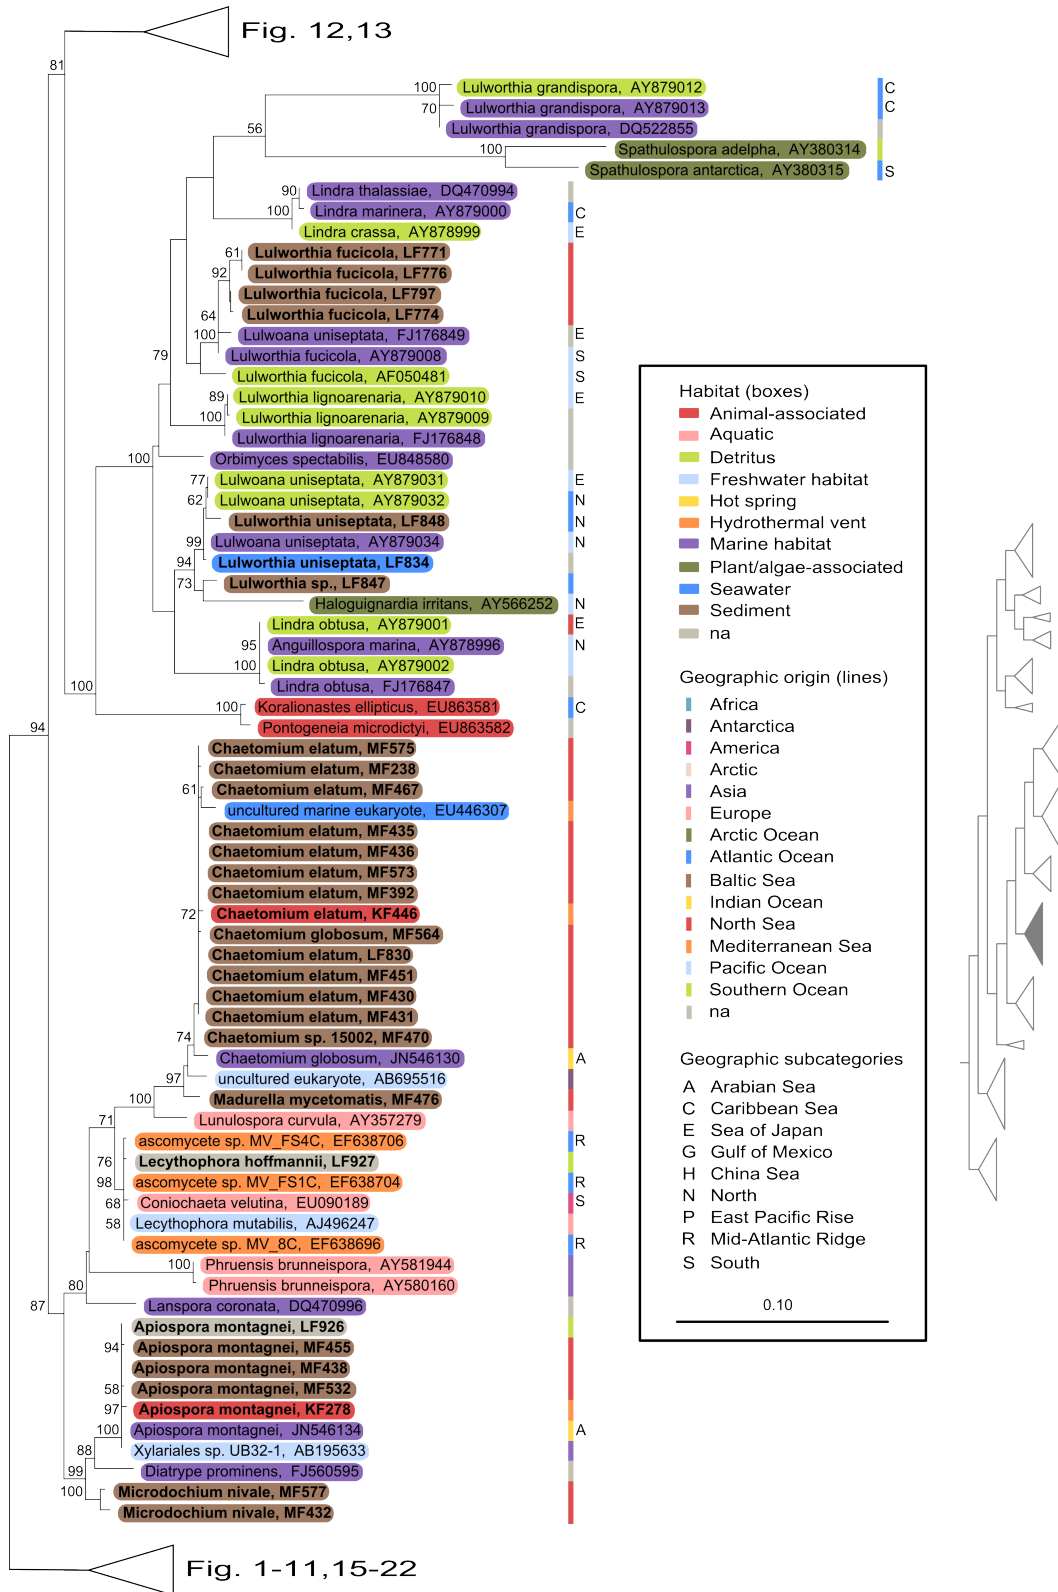

Figure 15: Subsection of *Saccharomyces*

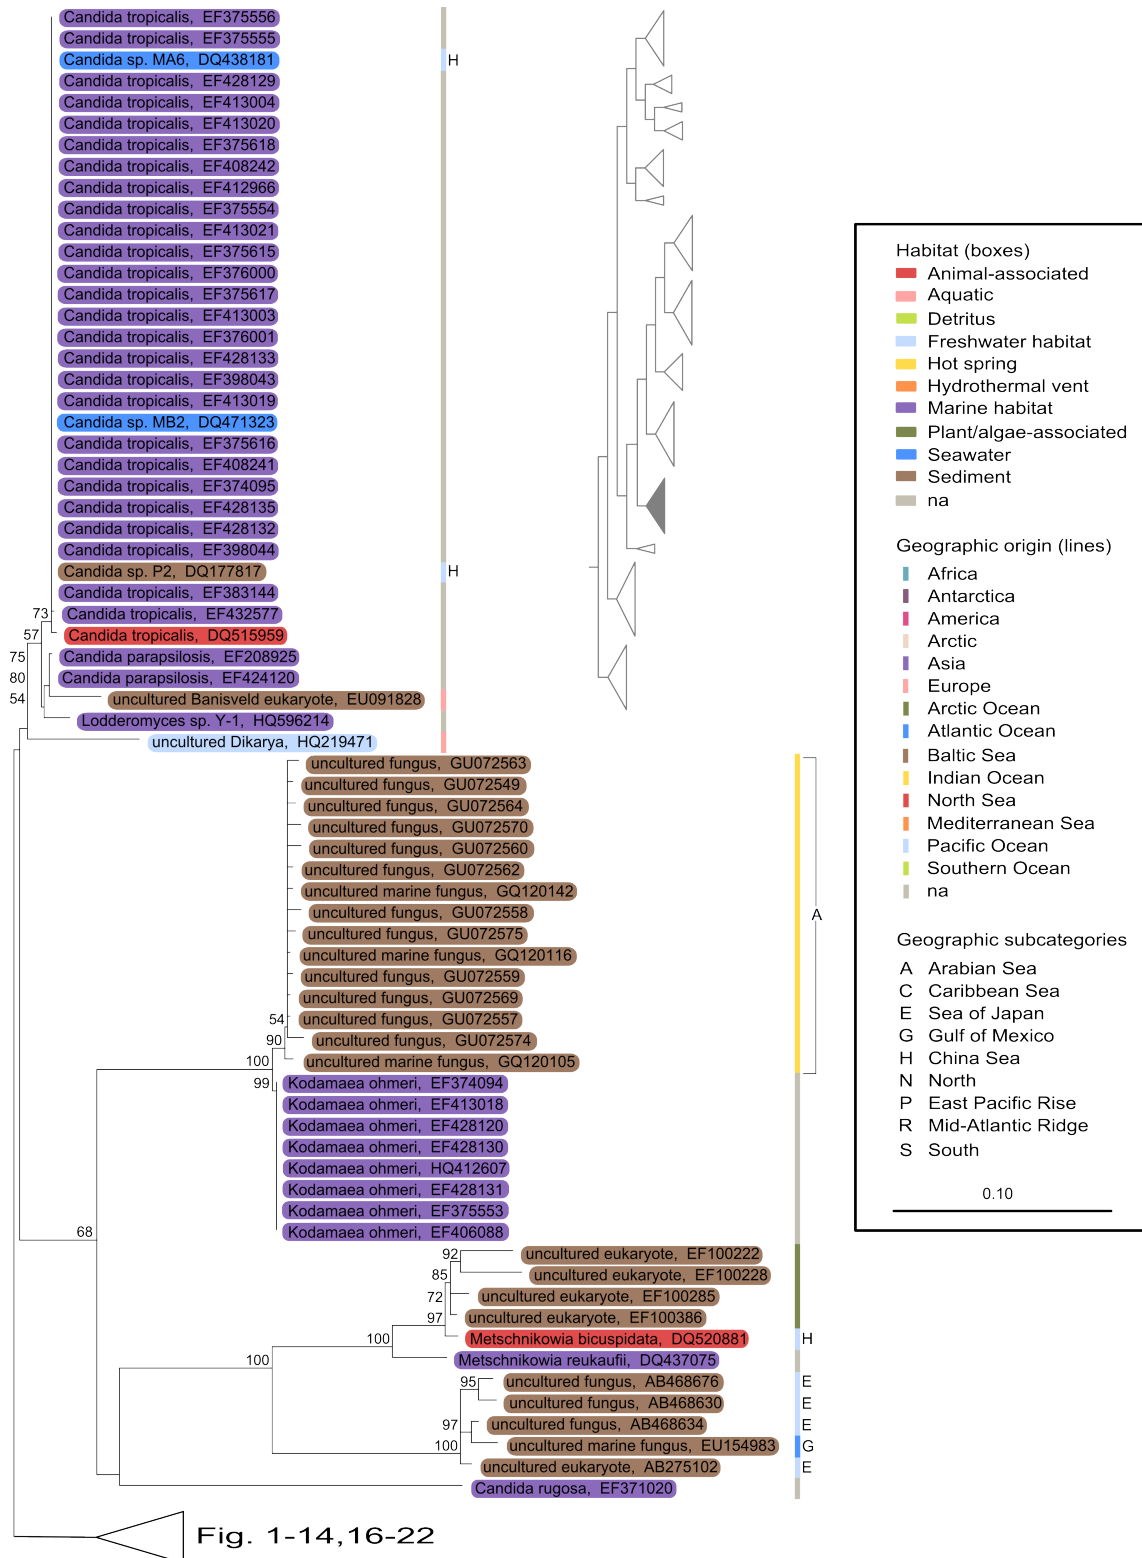



Figure 16: Subsection of *Saccharomyces*

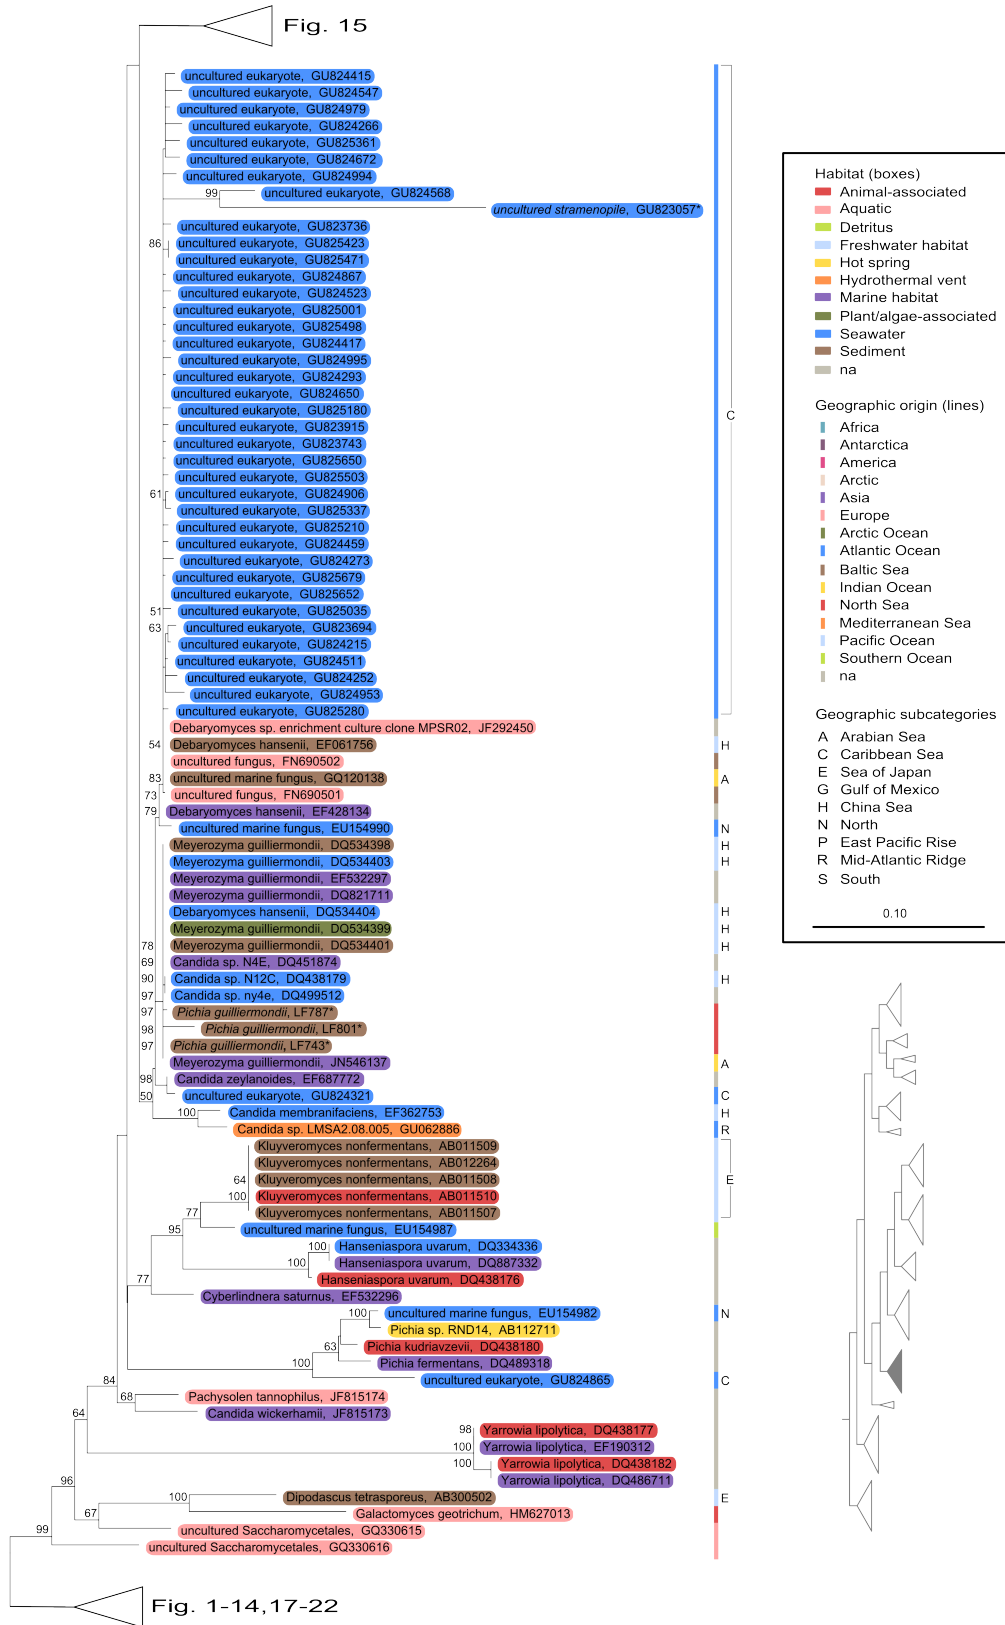

Figure 17: Subsection of *Taphrinomycotina*

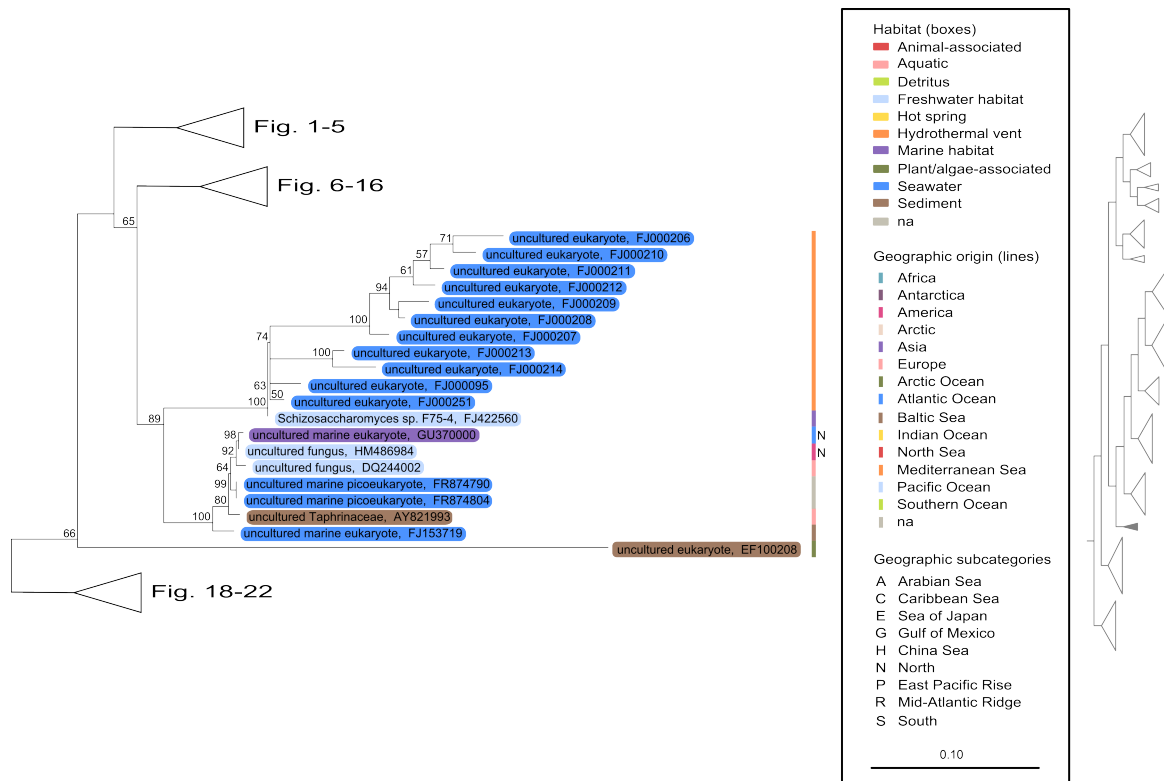

Figure 18: Subsection of *Chytridiomycota*

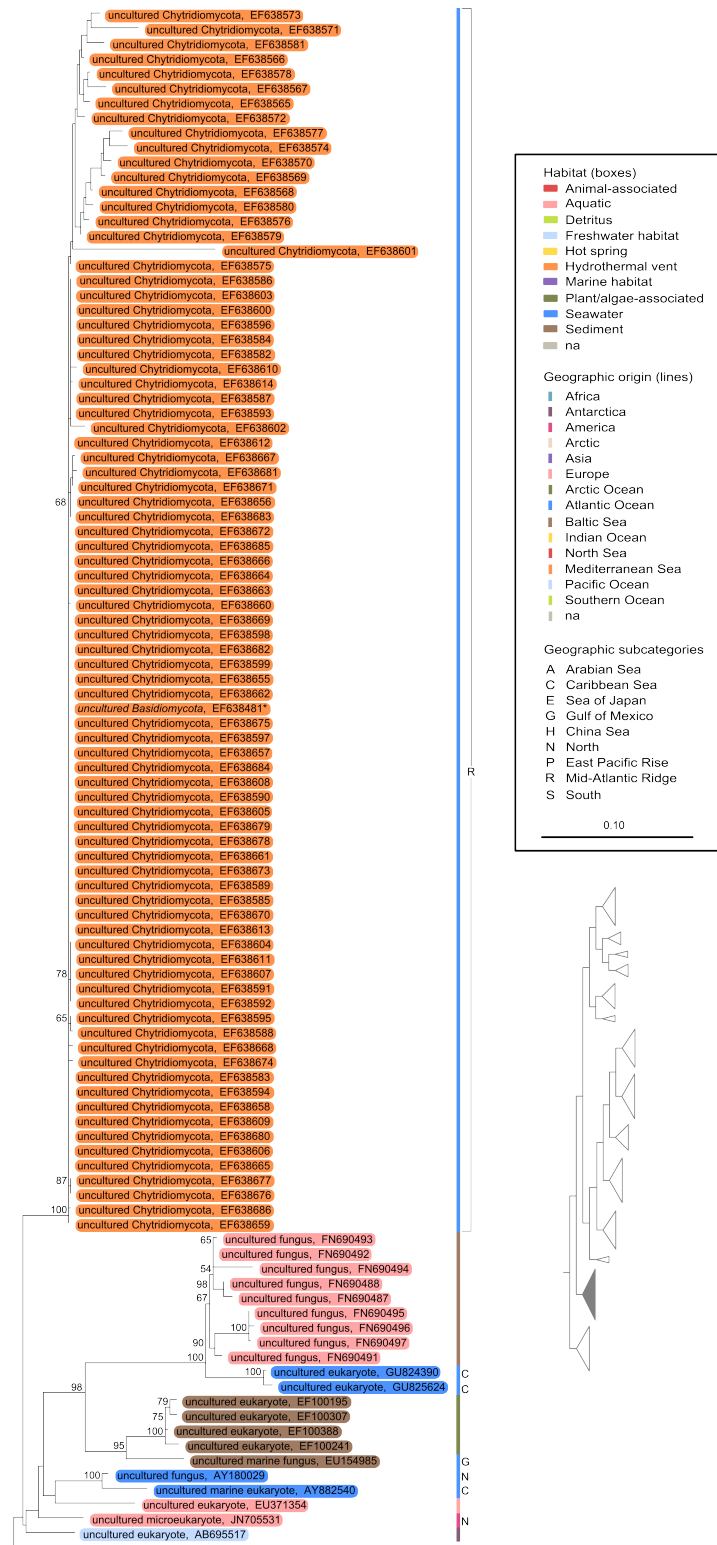

Figure 19: Subsection of *Chytridiomycota*

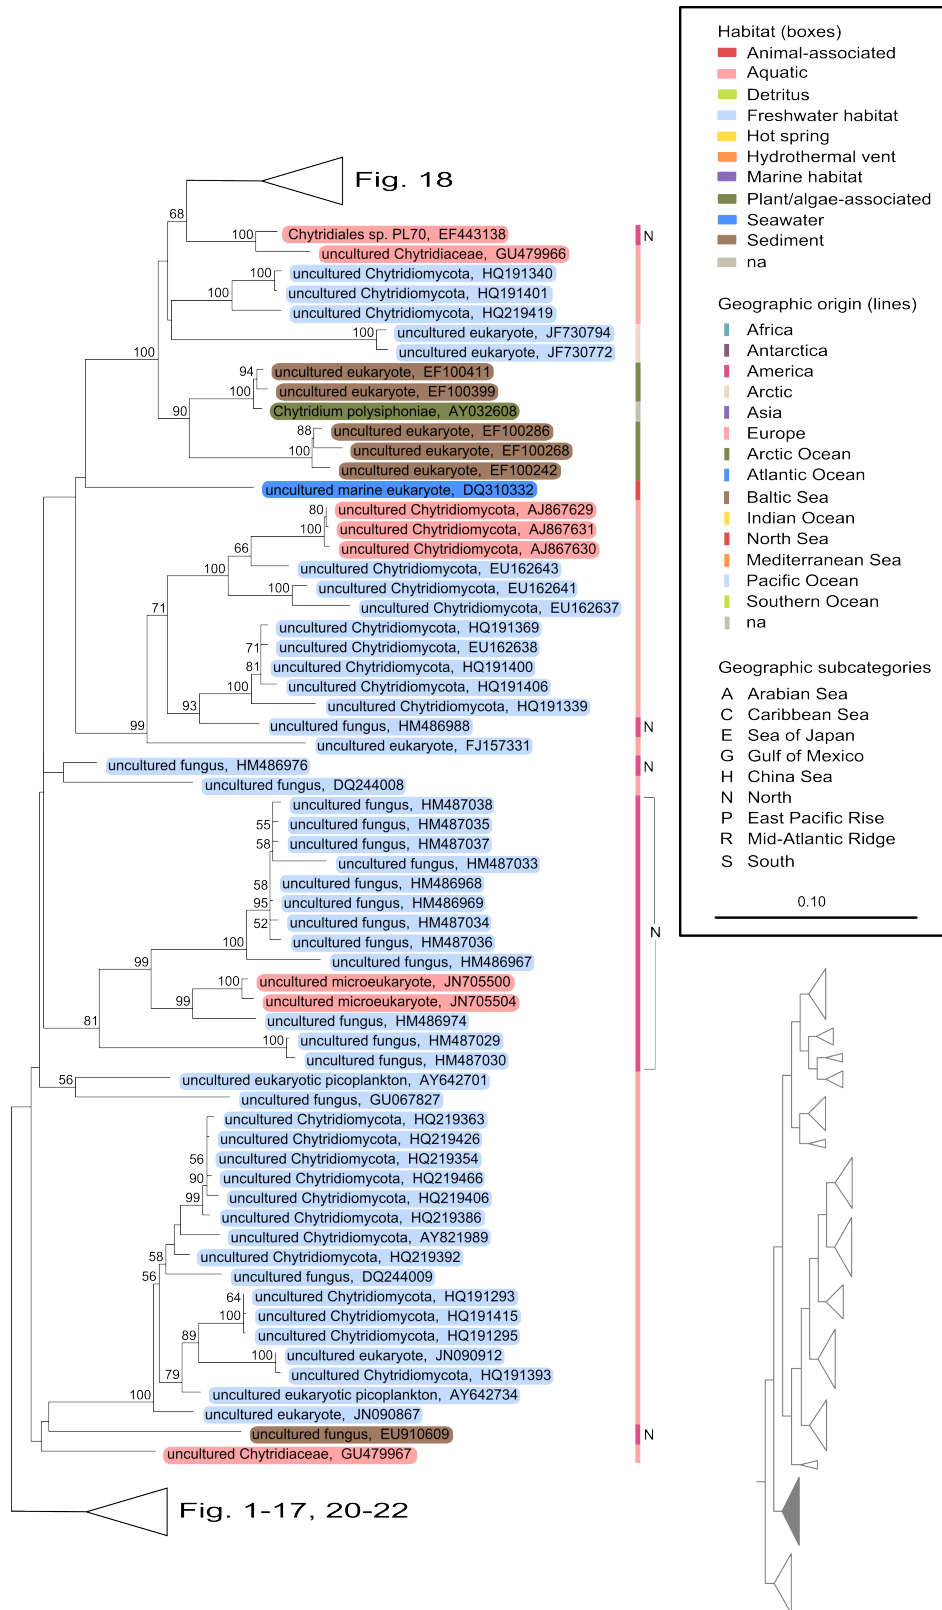

Figure 20: Subsection of *Chytridiomycota*

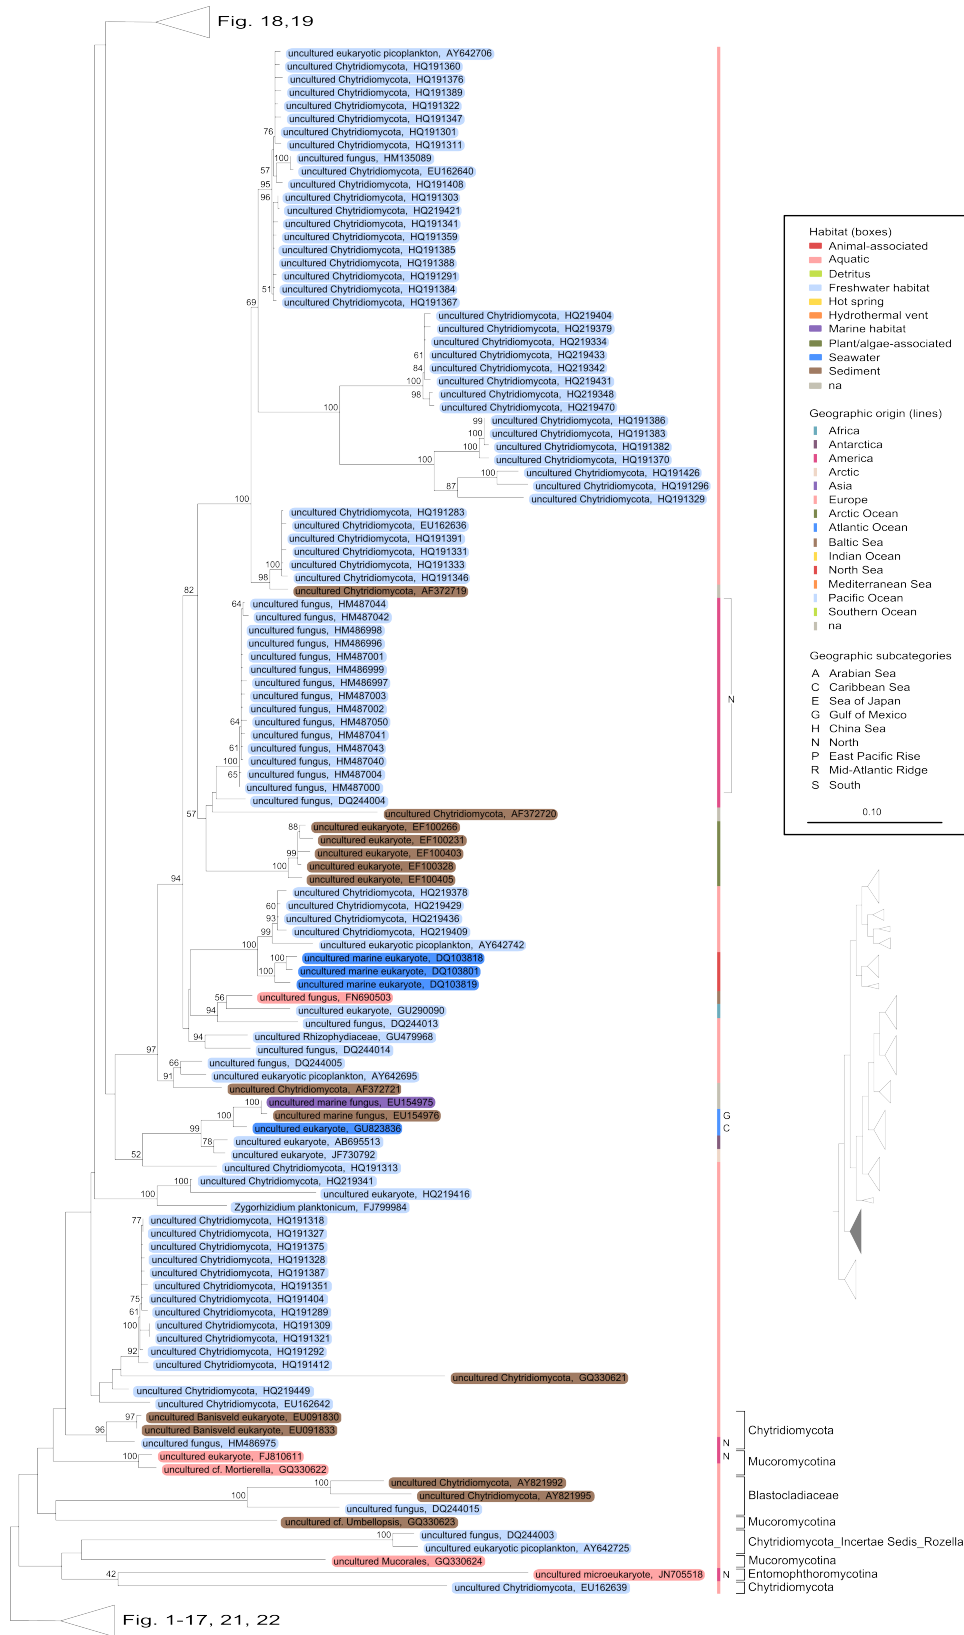

Figure 21: Subsection of basal fungal lineages

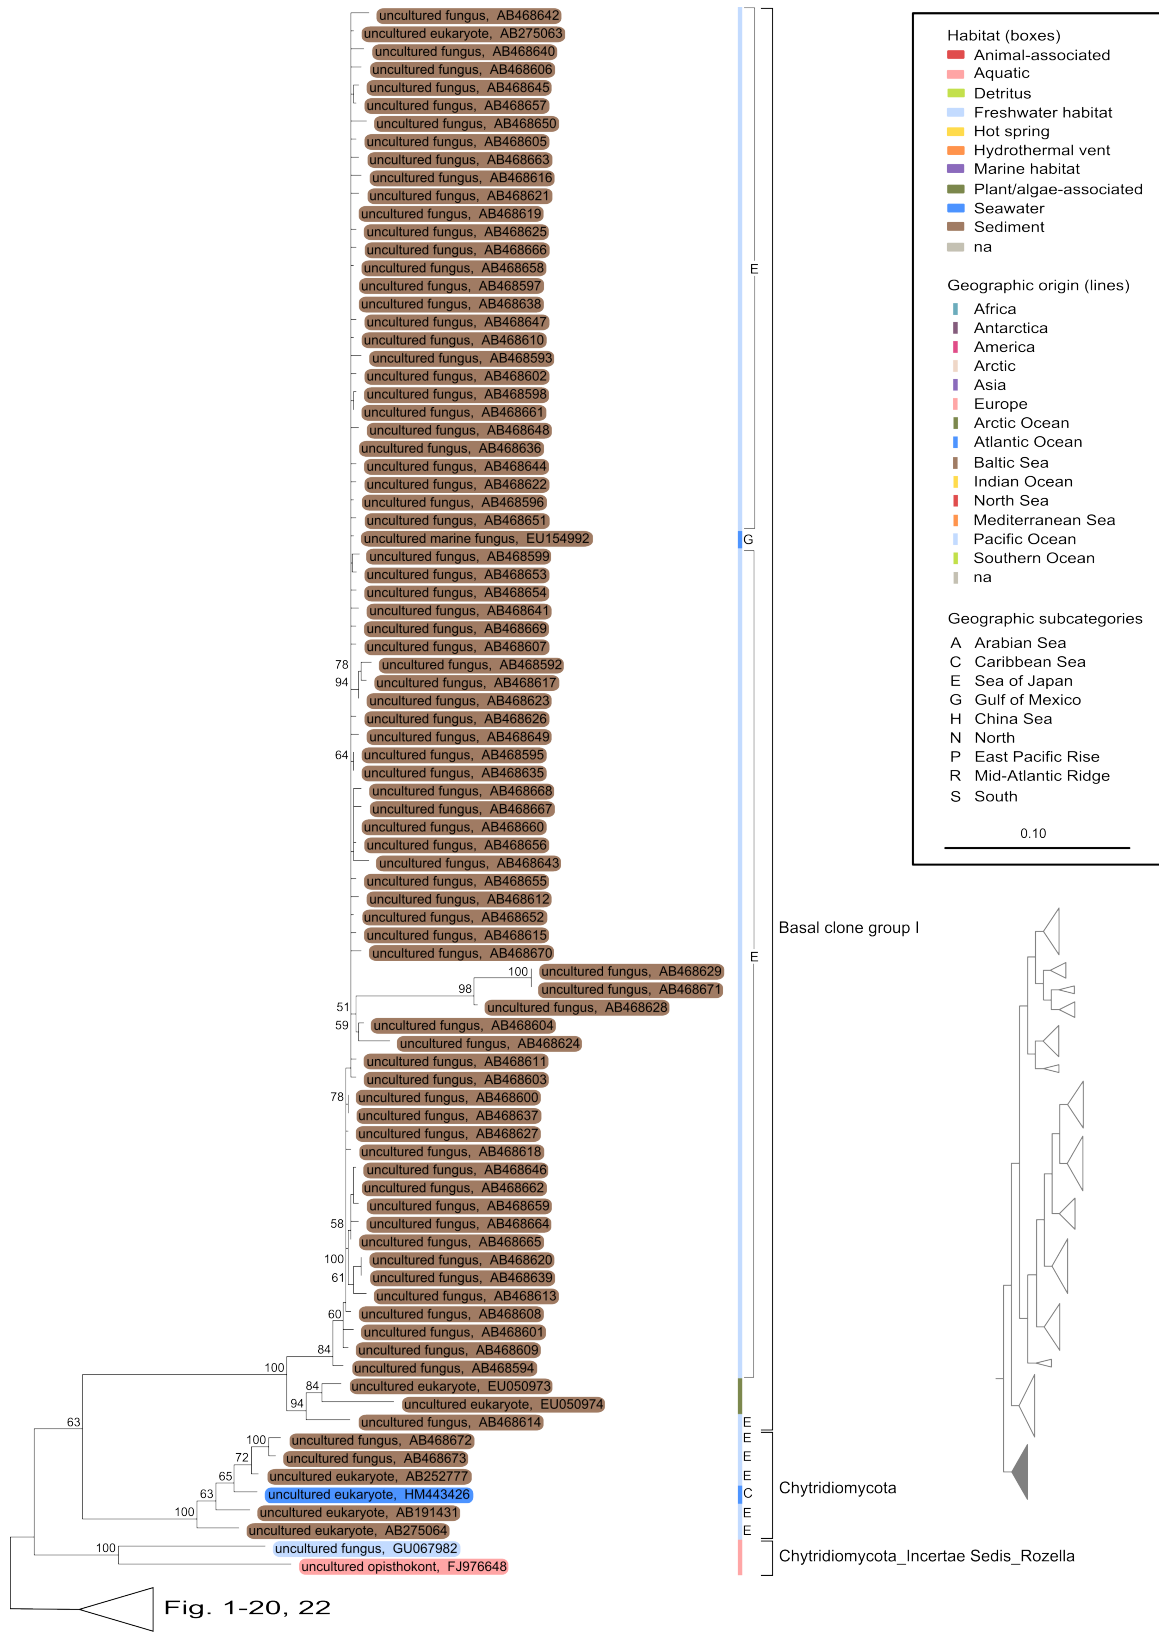

Figure 22: Subsection of basal fungal lineages

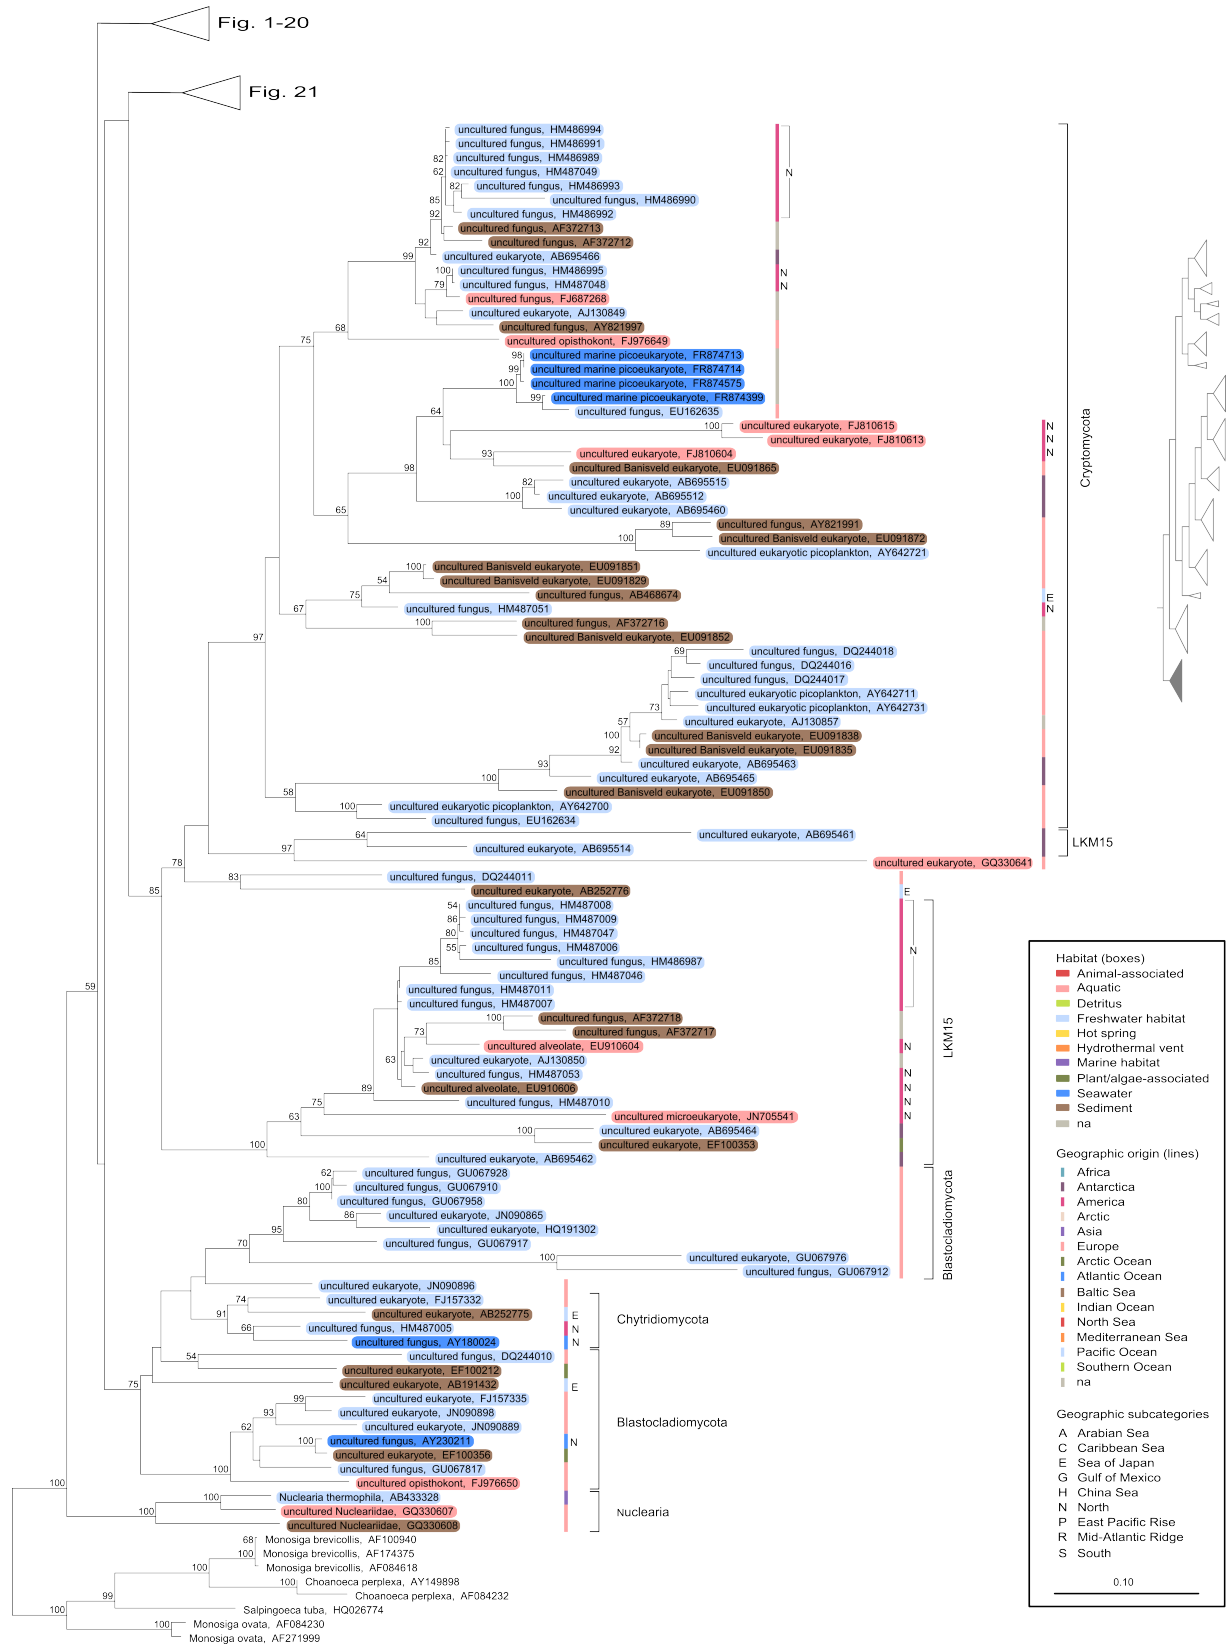

Supplement: pone.0134377.s001.pdf [file pone.0134377.s001.pdf]
