# Supplementary material for: Identification of Habitat-Specific Biomes of Aquatic Fungal Communities Using a Comprehensive Nearly Full-Length 18S rRNA Dataset Enriched with Contextual Data
Source: PubMed Central journal article supplement (PMC4520555; doi:10.1371/journal.pone.0134377), 2015-07-30

Phylogenetic distances  
between sub-communities

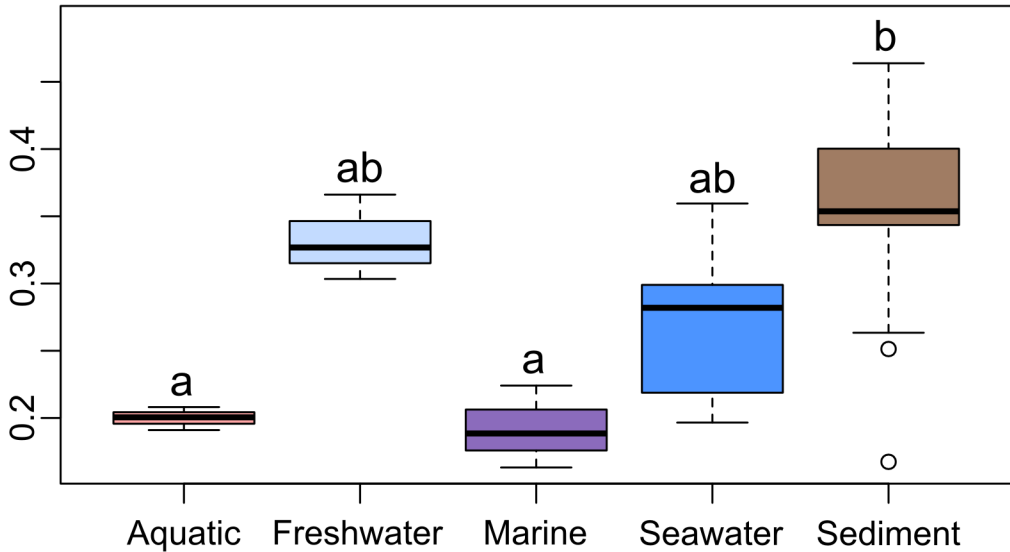

Supplement: pone.0134377.s002.pdf [file pone.0134377.s002.pdf]
