# Supplementary material for: Identification of Habitat-Specific Biomes of Aquatic Fungal Communities Using a Comprehensive Nearly Full-Length 18S rRNA Dataset Enriched with Contextual Data
Source: PubMed Central journal article supplement (PMC4520555; doi:10.1371/journal.pone.0134377), 2015-07-30
Supplement: pone.0134377.s003.pdf [file pone.0134377.s003.pdf]

**Supplementary Table S1: Information on sequences of the KSMP-Kiel culture collection used for this study.** After manually inspection of all BLAST-N hits, sequences were assigned to a submission name.

| <b>Accession No.</b> | <b>Strain</b> | <b>Submission name</b>            | <b>Best BLAST-N hit</b>                               | <b>Habitat</b>    | <b>Geographic Origin</b> |
|----------------------|---------------|-----------------------------------|-------------------------------------------------------|-------------------|--------------------------|
| KJ939309             | MF566         | <i>Exophiala castellanii</i>      | <i>Exophiala castellanii</i>                          | sediment          | North Sea                |
| KJ939310             | LF927         | <i>Lecythophora hoffmannii</i>    | <i>Lecythophora hoffmannii</i>                        | na                | Southern Ocean           |
| KJ939311             | MF583         | <i>Phialophora</i> sp.            | <i>Phialophora</i> sp. GHP 1105                       | sediment          | North Sea                |
| KJ939312             | MF464         | <i>Plectosphaerella</i> sp.       | <i>Plectosphaerella</i> sp. MH727                     | sediment          | North Sea                |
| KJ939313             | MF526         | <i>Thelebolus microsporus</i>     | <i>Thelebolus microsporus</i>                         | sediment          | North Sea                |
| KM096133             | KF027         | <i>Paraconiothyrium variabile</i> | <i>Paraconiothyrium variabile</i>                     | animal-associated | Mediterranean Sea        |
| KM096134             | KF029         | <i>Paraconiothyrium variabile</i> | <i>Paraconiothyrium variabile</i>                     | animal-associated | Mediterranean Sea        |
| KM096135             | KF043         | <i>Paraconiothyrium variabile</i> | <i>Paraconiothyrium variabile</i>                     | animal-associated | Mediterranean Sea        |
| KM096136             | KF071         | <i>Paraconiothyrium variabile</i> | <i>Paraconiothyrium variabile</i>                     | animal-associated | Mediterranean Sea        |
| KM096137             | KF074         | <i>Pleosporales</i> sp.           | <i>Trematosphaeria pertusa</i> isolate AFTOL-ID #1589 | animal-associated | Mediterranean Sea        |
| KM096138             | KF098         | <i>Acremonium</i> sp.             | <i>Volutella colletotrichoides</i>                    | seawater          | Mediterranean Sea        |
| KM096139             | KF103         | <i>Sarocladium bactrocephalum</i> | <i>Acremonium</i> -like hyphomycete KR21-2 gene       | seawater          | Mediterranean Sea        |
| KM096140             | KF114         | <i>Paraconiothyrium variabile</i> | <i>Paraconiothyrium variabile</i>                     | seawater          | Mediterranean Sea        |
| KM096141             | KF128         | <i>Penicillium</i> sp.            | <i>Penicillium</i> sp. - GT 308                       | animal-associated | Baltic Sea               |
| KM096142             | KF131         | <i>Pleosporales</i> sp.           | <i>Neophaeosphaeria filamentosa</i>                   | animal-associated | Baltic Sea               |
| KM096143             | KF133         | <i>Penicillium</i> sp.            | <i>Penicillium</i> sp. - GT 308                       | animal-associated | Baltic Sea               |
| KM096144             | KF157         | <i>Rhodotorula lysiniphila</i>    | <i>Rhodotorula lysiniphila</i>                        | na                | Southern Ocean           |
| KM096145             | KF162         | <i>Rhodosporidium diobovatum</i>  | <i>Rhodosporidium diobovatum</i>                      | na                | Southern Ocean           |
| KM096146             | KF165         | <i>Rhodotorula lysiniphila</i>    | <i>Rhodotorula lysiniphila</i>                        | na                | Southern Ocean           |
| KM096147             | KF172         | <i>Dothideomycetes</i> sp.        | <i>Endoconidioma populi</i>                           | na                | Southern Ocean           |
| KM096148             | KF185         | <i>Exophiala</i> sp.              | <i>Exophiala</i> sp. FFC-1                            | na                | Southern Ocean           |
| KM096149             | KF200         | <i>Pleosporales</i> sp.           | <i>Ascochyta rabiei</i>                               | na                | Southern Ocean           |
| KM096150             | KF201         | <i>Penicillium</i> sp.            | <i>Penicillium</i> sp. GT308                          | na                | Southern Ocean           |
| KM096151             | KF202         | <i>Paecilomyces</i> sp.           | <i>Paecilomyces lilacinus</i>                         | na                | Southern Ocean           |
| KM096152             | KF204         | <i>Paecilomyces</i> sp.           | <i>Paecilomyces lilacinus</i>                         | na                | Southern Ocean           |
| KM096153             | KF215         | <i>Fusarium</i> sp.               | <i>Fusarium</i> sp. 13002                             | animal-associated | Mediterranean Sea        |
| KM096154             | KF221         | <i>Penicillium</i> sp.            | <i>Penicillium</i> sp. GT308                          | seawater          | Mediterranean Sea        |
| KM096155             | KF266         | <i>Penicillium</i> sp.            | <i>Eupenicillium javanicum</i>                        | animal-associated | Mediterranean Sea        |
| KM096156             | KF268         | <i>Alternaria</i> sp.             | <i>Lewia eureka</i>                                   | animal-associated | Mediterranean Sea        |
| KM096157             | KF269         | <i>Acremonium</i> sp.             | <i>Volutella colletotrichoides</i>                    | animal-associated | Mediterranean Sea        |
| KM096158             | KF272         | <i>Penicillium</i> sp.            | <i>Penicillium</i> sp. GT308                          | animal-associated | Mediterranean Sea        |
| KM096159             | KF277         | <i>Penicillium</i> sp.            | <i>Penicillium</i> sp. GT308                          | animal-associated | Mediterranean Sea        |
| KM096160             | KF278         | <i>Arthrinium</i> sp.             | <i>Apiospora montagnei</i>                            | animal-associated | Mediterranean Sea        |
| KM096161             | KF291         | <i>Phaeosphaeriaceae</i> sp.      | <i>Septoria nodorum</i> DAOM 215173                   | animal-associated | Baltic Sea               |
| KM096162             | KF302         | <i>Penicillium</i> sp.            | <i>Penicillium</i> sp. GT308                          | animal-associated | Mediterranean Sea        |
| KM096163             | KF311         | <i>Penicillium</i> sp.            | <i>Penicillium</i> sp. GT308                          | animal-associated | Mediterranean Sea        |
| KM096164             | KF335         | <i>Cladosporium</i> sp.           | <i>Cladosporium cladosporioides</i>                   | sediment          | Baltic Sea               |
| KM096165             | KF387         | <i>Hypocreales</i> sp.            | <i>Illosporium carneum</i>                            | sediment          | Baltic Sea               |
| KM096166             | KF433         | <i>Engyodontium album</i>         | <i>Engyodontium album</i> NBRC 32828                  | animal-associated | Baltic S                 |
| KM096167             | KF437         | <i>Phaeosphaeriaceae</i> sp.      | <i>Septoria nodorum</i> DAOM 215173                   | animal-associated | Baltic Sea               |
| KM096168             | KF446         | <i>Chaetomium elatum</i>          | <i>Chaetomium elatum</i>                              | animal-associated | Mediterranean Sea        |
| KM096169             | KF607         | <i>Penicillium</i> sp.            | <i>Penicillium</i> sp. GT308                          | seawater          | North Sea                |
| KM096170             | KF612         | <i>Penicillium</i> sp.            | <i>Penicillium chrysogenum</i>                        | seawater          | North Sea                |
| KM096171             | KF620         | <i>Penicillium</i> sp.            | <i>Penicillium camemberti</i>                         | seawater          | North Sea                |
| KM096172             | KF648         | <i>Penicillium</i> sp.            | <i>Eupenicillium javanicum</i>                        | seawater          | North Sea                |
| KM096173             | KF767         | <i>Helicodendron paradoxum</i>    | <i>Helicodendron paradoxum</i>                        | seawater          | North Sea                |
| KM096174             | KF852         | <i>Trichoderme</i> sp.            | <i>Hypocrea muroiana</i>                              | seawater          | North Sea                |

|          |        |                                       |                                                            |                   |                      |
|----------|--------|---------------------------------------|------------------------------------------------------------|-------------------|----------------------|
| KM096175 | KF869  | <i>Penicillium</i> sp.                | <i>Penicillium</i> sp. CCF3812                             | seawater          | North Sea            |
| KM096176 | KF970  | <i>Lindgomycetaceae</i> sp.           | uncultured fungus gene                                     | sediment          | North Sea            |
| KM096177 | KF976  | <i>Plectosphaerellaceae</i> sp.       | uncultured fungus gene                                     | sediment          | North Sea            |
| KM096178 | LF063  | <i>Cladosporium</i> sp.               | <i>Cladosporium cladosporioides</i> isolate AFTOL-ID #1289 | animal-associated | Mediterranean Sea    |
| KM096179 | LFM183 | <i>Pleosporales</i> sp.               | <i>Cucurbitaria elongata</i> isolate AFTOL-ID #1568        | animal-associated | Mediterranean Sea    |
| KM096180 | LF184  | <i>Cladosporium</i> sp.               | <i>Cladosporium cladosporioides</i> strain UPSC 1657       | animal-associated | Mediterranean Sea    |
| KM096181 | LF212  | <i>Geosmithia putterillii</i>         | <i>Geosmithia putterillii</i>                              | animal-associated | Mediterranean Sea    |
| KM096182 | LF213  | <i>Hypocreales</i> sp.                | <i>Nectria lugdunensis</i> strain CS-950                   | animal-associated | Mediterranean Sea    |
| KM096183 | LF240  | <i>Pleosporaceae</i> sp.              | <i>Embellisia</i> sp. DAR74619                             | animal-associated | Mediterranean Se     |
| KM096184 | LF244  | <i>Cladosporium</i> sp.               | <i>Cladosporium cladosporioides</i> isolate AFTOL-ID #1289 | animal-associated | Mediterranean Se     |
| KM096185 | LF248  | <i>Sclerotiniaceae</i> sp.            | <i>Botryotinia fuckeliana</i> isolate AFTOL-ID 59          | animal-associated | Mediterranean Sea    |
| KM096186 | LF255  | <i>Alternaria</i> sp.                 | <i>Alternaria alternata</i> AA6 nuclear                    | animal-associated | Mediterranean Sea    |
| KM096187 | LF257  | <i>Cladosporium</i> sp.               | <i>Cladosporium cladosporioides</i> strain UPSC 1657       | animal-associated | Mediterranean Sea    |
| KM096188 | LF258  | <i>Phaeosphaeriaceae</i> sp.          | <i>Phaeosphaeria anchiala/avenaria</i>                     | animal-associated | Mediterranean Sea    |
| KM096189 | LF384  | <i>Geosmithia putterillii</i>         | <i>Geosmithia putterillii</i>                              | animal-associated | Mediterranean Se     |
| KM096190 | LF385  | <i>Geosmithia putterillii</i>         | <i>Geosmithia putterillii</i>                              | animal-associated | Mediterranean Sea    |
| KM096191 | LF387  | <i>Aspergillus versicolor</i>         | <i>Aspergillus versicolor</i>                              | animal-associated | Mediterranean Sea    |
| KM096192 | LF389  | <i>Acremonium antarcticum</i>         | uncultured fungus gene                                     | animal-associated | Mediterranean Sea    |
| KM096193 | LF562  | <i>Engyodontium</i> sp.               | <i>Tritirachium</i> sp. IAM 14522                          | animal-associated | Mediterranean Sea    |
| KM096194 | LF580  | <i>Scopulariopsis brevicaulis</i>     | <i>Scopulariopsis brevicaulis</i> strain NCPF 2177         | animal-associated | Mediterranean Sea    |
| KM096195 | LF617  | <i>Phoma</i> sp.                      | <i>Phoma</i> sp. Y3EG-2010                                 | animal-associated | Mediterranean Sea    |
| KM096196 | LF691  | <i>Corollospora</i> sp.               | <i>Culcitalna achraspora</i>                               | seawater          | North Sea            |
| KM096197 | LF693  | <i>Corollospora</i> sp.               | <i>Culcitalna achraspora</i>                               | sediment          | North Sea            |
| KM096198 | LF729  | <i>Cirrenalia macrocephala</i>        | <i>Cirrenalia macrocephala</i>                             | detritus          | North Sea            |
| KM096199 | LF743  | <i>Debaryomycetaceae</i> sp.          | <i>Pichia guilliermondii</i>                               | sediment          | North Sea            |
| KM096200 | LF747  | <i>Corollospora quinqueseptata</i>    | <i>Culcitalna achraspora</i>                               | sediment          | North Sea            |
| KM096201 | LF750  | <i>Hypocreales</i> sp.                | <i>Nectria lugdunensis</i>                                 | sediment          | North Sea            |
| KM096202 | LF755  | <i>Hypocreales</i> sp.                | <i>Nectria lugdunensis</i>                                 | sediment          | North Sea            |
| KM096203 | LF756  | <i>Corollospora</i> sp.               | <i>Culcitalna achraspora</i>                               | sediment          | North Sea            |
| KM096204 | LF759  | <i>Microascaceae</i> sp.              | <i>Petriella setifera</i>                                  | detritus          | North Sea            |
| KM096205 | LF769  | <i>Fusarium</i> sp.                   | <i>Fusarium</i> sp.                                        | sediment          | North Sea            |
| KM096206 | LF771  | <i>Lulworthia fucicola</i>            | <i>Lulworthia fucicola</i>                                 | sediment          | North Sea            |
| KM096207 | LF774  | <i>Lulworthia fucicola</i>            | <i>Lulworthia fucicola</i>                                 | sediment          | North Sea            |
| KM096208 | LF776  | <i>Lulworthia fucicola</i>            | <i>Lulworthia fucicola</i>                                 | sediment          | North Sea            |
| KM096209 | LF787  | <i>Saccharomycetales</i> sp.          | <i>Pichia guilliermondii</i>                               | sediment          | North Sea            |
| KM096210 | LF797  | <i>Lulworthia fucicola</i>            | <i>Lulworthia fucicola</i>                                 | sediment          | North Sea            |
| KM096211 | LF801  | <i>Saccharomycetales</i> sp.          | <i>Pichia guilliermondii</i>                               | sediment          | North Sea            |
| KM096212 | LF813  | <i>Corollospora lacera</i>            | <i>Culcitalna achraspora</i>                               | sediment          | North Sea            |
| KM096213 | LF823  | <i>Microascus cirrosus</i>            | <i>Microascus cirrosus</i>                                 | sediment          | North Sea            |
| KM096214 | LF825  | <i>Plectosphaerellaceae</i> sp.       | <i>Verticillium dahliae</i>                                | detritus          | North Sea            |
| KM096215 | LF826  | <i>Leotiomycetes</i> sp.              | <i>Bulgaria inquinans</i>                                  | sediment          | North Sea            |
| KM096216 | LF830  | <i>Chaetomium elatum</i>              | <i>Chaetomium elatum</i>                                   | sediment          | North Sea            |
| KM096217 | LF832  | <i>Microascales</i> sp.               | <i>Humicola</i> sp.                                        | sediment          | North Sea            |
| KM096218 | LF834  | <i>Lulworthia uniseptata</i>          | <i>Lulworthia uniseptata</i>                               | seawater          | na                   |
| KM096219 | LF845  | <i>Scytalidium lignicola</i>          | <i>Scytalidium lignicola</i>                               | sediment          | North Sea            |
| KM096220 | LF847  | <i>Lulworthia</i> cf. <i>purpurea</i> | <i>Lulworthia</i> sp.                                      | sediment          | North Atlantic Ocean |
| KM096221 | LF848  | <i>Lulworthia uniseptata</i>          | <i>Lulworthia uniseptata</i>                               | sediment          | North Atlantic Ocean |
| KM096222 | LF853  | <i>Penicillium</i> sp.                | <i>Penicillium</i> sp.                                     | na                | Southern Ocean       |
| KM096223 | LF886  | <i>Pleosporales</i> sp.               | <i>Paraconiothyrium variabile</i>                          | na                | Southern Ocean       |
| KM096224 | LF896  | <i>Hypocreales</i> sp.                | <i>Stilbocrea macrostoma</i>                               | na                | Southern Ocean       |
| KM096225 | LF926  | <i>Arthrimum arundinis</i>            | <i>Apiospora montagnei</i>                                 | na                | Southern Ocean       |
| KM096226 | LF928  | <i>Penicillium</i> sp.                | <i>Penicillium</i> sp. GT308                               | na                | Southern Ocean       |

|          |       |                                        |                                        |                   |                     |
|----------|-------|----------------------------------------|----------------------------------------|-------------------|---------------------|
| KM096227 | LF980 | <i>Rhodotorula lysiniphila</i>         | <i>Rhodotorula lysiniphila</i>         | na                | Southern Ocean      |
| KM096228 | MF227 | <i>Aureobasidium pullulans</i>         | <i>Aureobasidium pullulans</i>         | sediment          | na                  |
| KM096229 | MF228 | <i>Tilletiopsis albescens</i>          | <i>Tilletiopsis albescens</i>          | seawater          | na                  |
| KM096230 | MF229 | <i>Aspergillus versicolor</i>          | <i>Aspergillus versicolor</i>          | sediment          | na                  |
| KM096231 | MF230 | <i>Ophiosphaerella herpotricha</i>     | <i>Ophiosphaerella herpotricha</i>     | sediment          | na                  |
| KM096232 | MF238 | <i>Chaetomium elatum</i>               | <i>Chaetomium elatum</i>               | sediment          | North Sea           |
| KM096233 | MF270 | <i>Phaeosphaeria</i> sp.               | uncultured fungus gene clone A_3_66    | sediment          | North Sea           |
| KM096234 | MF277 | <i>Doratomyces stemonitis</i>          | <i>Doratomyces stemonitis</i>          | sediment          | North Sea           |
| KM096235 | MF278 | <i>Doratomyces stemonitis</i>          | <i>Doratomyces stemonitis</i>          | sediment          | North Sea           |
| KM096236 | MF376 | <i>Penicillium</i> sp.                 | <i>Penicillium</i> sp. 12-02           | sediment          | North Sea           |
| KM096237 | MF377 | <i>Pleosporaceae</i> sp.               | <i>Embellisia</i> sp. DAR 74619        | sediment          | North Sea           |
| KM096238 | MF378 | <i>Alternaria</i> sp.                  | <i>Alternaria alternata</i>            | sediment          | North Sea           |
| KM096239 | MF381 | <i>Epicoccum nigrum</i>                | <i>Cochliobolus kusanoi</i>            | sediment          | North Sea           |
| KM096240 | MF382 | <i>Alternaria</i> sp.                  | <i>Alternaria alternata</i>            | sediment          | North Sea           |
| KM096241 | MF385 | <i>Pleosporales</i> sp.                | <i>Pleosporales</i> sp. GFL014         | sediment          | North Sea           |
| KM096242 | MF386 | <i>Pleosporales</i> sp.                | <i>Pleosporales</i> sp. GFL014#        | sediment          | North Sea           |
| KM096243 | MF388 | <i>Pyrenochaeta</i> sp.                | <i>Pyrenochaeta</i> sp. GMG PPb7       | sediment          | North Sea           |
| KM096244 | MF391 | <i>Embellisia</i> sp.                  | <i>Embellisia</i> sp. DAR 74619        | sediment          | North Sea           |
| KM096245 | MF392 | <i>Chaetomium elatum</i>               | <i>Chaetomium elatum</i>               | sediment          | North Sea           |
| KM096246 | MF393 | <i>Fusarium culmorum</i>               | <i>Fusarium culmorum</i>               | sediment          | North Sea           |
| KM096247 | MF394 | <i>Fusarium</i> sp.                    | <i>Fusarium</i> sp. 13002              | sediment          | North Sea           |
| KM096248 | MF395 | <i>Fusarium</i> sp.                    | <i>Fusarium</i> sp. FW2PhC1            | sediment          | North Sea           |
| KM096249 | MF396 | <i>Penicillium citrinum</i>            | <i>Penicillium</i> sp. CTCC 480032     | animal-associated | South Pacific Ocean |
| KM096250 | MF399 | <i>Penicillium citrinum</i>            | <i>Penicillium</i> sp. CTCC 480032     | animal-associated | South Pacific Ocean |
| KM096251 | MF408 | <i>Penicillium citrinum</i>            | <i>Penicillium</i> sp. CTCC 480032     | animal-associated | South Pacific Ocean |
| KM096252 | MF410 | <i>Penicillium citrinum</i>            | <i>Penicillium</i> sp. CTCC 480032     | animal-associated | South Pacific Ocean |
| KM096253 | MF419 | <i>Byssochlamys spectabilis</i>        | <i>Paecilomyces variotii</i>           | animal-associated | South Pacific Ocean |
| KM096254 | MF423 | <i>Byssochlamys spectabilis</i>        | <i>Paecilomyces variotii</i>           | animal-associated | South Pacific Ocean |
| KM096255 | MF424 | <i>Byssochlamys spectabilis</i>        | <i>Paecilomyces variotii</i>           | animal-associated | South Pacific Ocean |
| KM096256 | MF430 | <i>Chaetomium elatum</i>               | <i>Chaetomium elatum</i>               | sediment          | North Sea           |
| KM096257 | MF431 | <i>Chaetomium elatum</i>               | <i>Chaetomium elatum</i>               | sediment          | North Sea           |
| KM096258 | MF432 | <i>Microdochium nivale</i>             | <i>Microdochium nivale</i>             | sediment          | North Sea           |
| KM096259 | MF433 | <i>Plectosphaerellaceae</i> sp.        | uncultured fungus gene                 | sediment          | North Sea           |
| KM096260 | MF435 | <i>Chaetomium elatum</i>               | <i>Chaetomium elatum</i>               | sediment          | North Sea           |
| KM096261 | MF436 | <i>Chaetomium elatum</i>               | <i>Chaetomium elatum</i>               | sediment          | North Sea           |
| KM096262 | MF438 | <i>Arthrinium</i> sp.                  | <i>Apiospora montagnei</i>             | sediment          | North Sea           |
| KM096263 | MF440 | <i>Penicillium namyslowskii</i>        | <i>Penicillium namyslowskii</i>        | sediment          | North Sea           |
| KM096264 | MF441 | <i>Kirschsteiniothelia elaterascus</i> | <i>Kirschsteiniothelia elaterascus</i> | sediment          | North Sea           |
| KM096265 | MF444 | <i>Pleosporales</i> sp.                | <i>Paraphaeosphaeria</i> sp. E5-3C     | sediment          | North Sea           |
| KM096266 | MF445 | <i>Penicillium</i> sp.                 | <i>Penicillium</i> sp. GT308           | sediment          | North Sea           |
| KM096267 | MF446 | <i>Penicillium</i> sp.                 | <i>Penicillium expansum</i>            | sediment          | North Sea           |
| KM096268 | MF447 | <i>Cladosporium</i> sp.                | <i>Cladosporium bruhnei</i>            | sediment          | North Sea           |
| KM096269 | MF448 | <i>Plectosphaerellaceae</i> sp.        | uncultured fungus gene                 | sediment          | North Sea           |
| KM096270 | MF449 | <i>Penicillium</i> sp.                 | <i>Penicillium camemberti</i>          | sediment          | North Sea           |
| KM096271 | MF450 | <i>Penicillium</i> sp.                 | <i>Penicillium chrysogenum</i>         | sediment          | North Sea           |
| KM096272 | MF451 | <i>Chaetomium elatum</i>               | <i>Chaetomium elatum</i>               | sediment          | North Sea           |
| KM096273 | MF452 | <i>Penicillium</i> sp.                 | <i>Penicillium expansum</i>            | sediment          | North Sea           |
| KM096274 | MF455 | <i>Arthrinium</i> sp.                  | <i>Apiospora montagnei</i>             | sediment          | North Sea           |
| KM096275 | MF456 | <i>Cladosporium</i> sp.                | <i>Cladosporium bruhnei</i>            | sediment          | North Sea           |
| KM096276 | MF459 | <i>Penicillium</i> sp.                 | <i>Penicillium</i> sp. GT308           | sediment          | North Sea           |
| KM096277 | MF460 | <i>Preussia</i> sp.                    | <i>Preussia terricola</i>              | sediment          | North Sea           |
| KM096278 | MF461 | <i>Penicillium</i> sp.                 | <i>Penicillium</i> sp. GT308           | sediment          | North Sea           |

|          |       |                                 |                                        |          |           |
|----------|-------|---------------------------------|----------------------------------------|----------|-----------|
| KM096279 | MF462 | <i>Penicillium</i> sp.          | <i>Penicillium chrysogenum</i>         | sediment | North Sea |
| KM096280 | MF463 | <i>Penicillium</i> sp.          | <i>Penicillium</i> sp. 1F              | sediment | North Sea |
| KM096281 | MF465 | <i>Pleosporales</i> sp.         | <i>Cochliobolus kusanoi</i>            | sediment | North Sea |
| KM096282 | MF466 | <i>Penicillium</i> sp.          | <i>Penicillium chrysogenum</i>         | sediment | North Sea |
| KM096283 | MF467 | <i>Chaetomium elatum</i>        | <i>Chaetomium elatum</i>               | sediment | North Sea |
| KM096284 | MF468 | <i>Penicillium</i> sp.          | <i>Penicillium</i> sp. GT308           | sediment | North Sea |
| KM096285 | MF470 | <i>Chaetomium</i> sp.           | <i>Chaetomium</i> sp. 15002            | sediment | North Sea |
| KM096286 | MF471 | <i>Preussia</i> sp.             | <i>Preussia terricola</i>              | sediment | North Sea |
| KM096287 | MF472 | <i>Penicillium</i> sp.          | <i>Penicillium</i> sp. GT308           | sediment | North Sea |
| KM096288 | MF474 | <i>Hypocreaceae</i> sp.         | <i>Hypocrea muroiana</i>               | sediment | North Sea |
| KM096289 | MF475 | <i>Penicillium</i> sp.          | <i>Penicillium</i> sp. GT308           | sediment | North Sea |
| KM096290 | MF476 | <i>Sordariales</i> sp.          | <i>Madurella mycetomatis</i>           | sediment | North Sea |
| KM096291 | MF477 | <i>Penicillium</i> sp.          | <i>Penicillium</i> sp. GT308           | sediment | North Sea |
| KM096292 | MF478 | <i>Penicillium</i> sp.          | <i>Penicillium</i> sp. GT308           | sediment | North Sea |
| KM096293 | MF479 | <i>Penicillium</i> sp.          | <i>Penicillium expansum</i>            | sediment | North Sea |
| KM096294 | MF482 | <i>Penicillium</i> sp.          | <i>Penicillium expansum</i>            | sediment | North Sea |
| KM096295 | MF484 | <i>Penicillium</i> sp.          | <i>Penicillium chrysogenum</i>         | sediment | North Sea |
| KM096296 | MF485 | <i>Penicillium</i> sp.          | <i>Penicillium chrysogenum</i>         | sediment | North Sea |
| KM096297 | MF486 | <i>Penicillium</i> sp.          | <i>Penicillium expansum</i>            | sediment | North Sea |
| KM096298 | MF487 | <i>Penicillium</i> sp.          | <i>Penicillium chrysogenum</i>         | sediment | North Sea |
| KM096299 | MF488 | <i>Penicillium</i> sp.          | <i>Penicillium expansum</i>            | sediment | North Sea |
| KM096300 | MF489 | <i>Hypocreales</i> sp.          | <i>Nectria lugdonensis</i>             | sediment | North Sea |
| KM096301 | MF490 | <i>Penicillium</i> sp.          | <i>Penicillium camemberti</i>          | sediment | North Sea |
| KM096302 | MF492 | <i>Penicillium</i> sp.          | <i>Penicillium expansum</i>            | sediment | North Sea |
| KM096303 | MF493 | <i>Penicillium</i> sp.          | <i>Penicillium chrysogenum</i>         | sediment | North Sea |
| KM096304 | MF494 | <i>Hypocreales</i> sp.          | <i>Elaphocordyceps ophioglossoides</i> | sediment | North Sea |
| KM096305 | MF495 | <i>Penicillium</i> sp.          | <i>Penicillium expansum</i>            | sediment | North Sea |
| KM096306 | MF496 | <i>Pleosporales</i> sp.         | <i>Paraphaeosphaeria</i> sp. E5-3C     | sediment | North Sea |
| KM096307 | MF497 | <i>Acremonium sclerotigenum</i> | <i>Acremonium sclerotigenum</i>        | sediment | North Sea |
| KM096308 | MF498 | <i>Geomyces</i> sp.             | <i>Geomyces</i> sp. P7                 | sediment | North Sea |
| KM096309 | MF502 | <i>Pleosporales</i> sp.         | <i>Paraphaeosphaeria</i> sp. E5-3C     | sediment | North Sea |
| KM096310 | MF503 | <i>Pleosporales</i> sp.         | <i>Paraphaeosphaeria</i> sp. E5-3C     | sediment | North Sea |
| KM096311 | MF504 | <i>Pleosporales</i> sp.         | <i>Paraphaeosphaeria</i> sp. E5-3C     | sediment | North Sea |
| KM096312 | MF505 | <i>Doratomyces stemonitis</i>   | <i>Doratomyces stemonitis</i>          | sediment | North Sea |
| KM096313 | MF506 | <i>Geomyces</i> sp.             | <i>Geomyces</i> sp. P7                 | sediment | North Sea |
| KM096314 | MF507 | <i>Pleosporales</i> sp.         | <i>Paraphaeosphaeria</i> sp. E5-3C     | sediment | North Sea |
| KM096315 | MF508 | <i>Penicillium</i> sp.          | <i>Penicillium tardum</i>              | sediment | North Sea |
| KM096316 | MF509 | <i>Penicillium</i> sp.          | <i>Penicillium brevicompactum</i>      | sediment | North Sea |
| KM096317 | MF510 | <i>Penicillium</i> sp.          | <i>Penicillium</i> sp. GT308           | sediment | North Sea |
| KM096318 | MF511 | <i>Fusarium</i> sp.             | <i>Fusarium</i> sp. MBS1               | sediment | North Sea |
| KM096319 | MF512 | <i>Pleosporales</i> sp.         | <i>Paraphaeosphaeria</i> sp. E5-3C     | sediment | North Sea |
| KM096320 | MF513 | <i>Penicillium</i> sp.          | <i>Eupenicillium javanicum</i>         | sediment | North Sea |
| KM096321 | MF514 | <i>Geomyces</i> sp.             | <i>Geomyces destructans</i>            | sediment | North Sea |
| KM096322 | MF515 | <i>Penicillium</i> sp.          | <i>Penicillium expansum</i>            | sediment | North Sea |
| KM096323 | MF518 | <i>Penicillium</i> sp.          | <i>Eupenicillium javanicum</i>         | sediment | North Sea |
| KM096324 | MF520 | <i>Penicillium</i> sp.          | <i>Penicillium</i> sp. 1F              | sediment | North Sea |
| KM096325 | MF521 | <i>Penicillium</i> sp.          | <i>Penicillium chrysogenum</i>         | sediment | North Sea |
| KM096326 | MF522 | <i>Penicillium namyslowskii</i> | <i>Penicillium namyslowskii</i>        | sediment | North Sea |
| KM096327 | MF523 | <i>Penicillium</i> sp.          | <i>Penicillium</i> sp. GT308           | sediment | North Sea |
| KM096328 | MF524 | <i>Penicillium</i> sp.          | <i>Penicillium camemberti</i>          | sediment | North Sea |
| KM096329 | MF525 | <i>Penicillium</i> sp.          | <i>Penicillium</i> sp. GT-308          | sediment | North Sea |
| KM096330 | MF527 | <i>Hypocreales</i> sp.          | <i>Paecilomyces hepiali</i>            | sediment | North Sea |

|          |       |                                 |                                      |                        |           |
|----------|-------|---------------------------------|--------------------------------------|------------------------|-----------|
| KM096331 | MF528 | <i>Cladosporium</i> sp.         | <i>Cladosporium</i> sp. CF-25        | sediment               | North Sea |
| KM096332 | MF530 | <i>Penicillium</i> sp.          | <i>Penicillium chrysogenum</i>       | sediment               | North Sea |
| KM096333 | MF532 | <i>Arthrinium</i> sp.           | <i>Apiospora montagnei</i>           | sediment               | North Sea |
| KM096334 | MF533 | <i>Pochonia suchlasporia</i>    | <i>Pochonia suchlasporia</i>         | sediment               | North Sea |
| KM096335 | MF534 | <i>Eurotium</i> sp.             | <i>Eurotium herbariorum</i>          | sediment               | North Sea |
| KM096336 | MF535 | <i>Cladosporium</i> sp.         | <i>Cladosporium</i> sp. CF-25        | sediment               | North Sea |
| KM096337 | MF538 | <i>Pleosporales</i> sp.         | <i>Cochliobolus kusanoi</i>          | sediment               | North Sea |
| KM096338 | MF540 | <i>Nectriaceae</i> sp.          | <i>Gibberella fujikuroi</i>          | sediment               | North Sea |
| KM096339 | MF541 | <i>Nectriaceae</i> sp.          | <i>Gibberella fujikuroi</i>          | sediment               | North Sea |
| KM096340 | MF542 | <i>Nectriaceae</i> sp.          | <i>Gibberella fujikuroi</i>          | sediment               | North Sea |
| KM096341 | MF543 | <i>Acremonium sclerotigenum</i> | <i>Acremonium sclerotigenum</i>      | sediment               | North Sea |
| KM096342 | MF544 | <i>Aspergillus versicolor</i>   | <i>Aspergillus versicolor</i>        | sediment               | North Sea |
| KM096343 | MF545 | <i>Aspergillus versicolor</i>   | <i>Aspergillus versicolor</i>        | sediment               | North Sea |
| KM096344 | MF546 | <i>Aspergillus versicolor</i>   | <i>Aspergillus versicolor</i>        | sediment               | North Sea |
| KM096345 | MF547 | <i>Acremonium sclerotigenum</i> | <i>Acremonium sclerotigenum</i>      | sediment               | North Sea |
| KM096346 | MF548 | <i>Pleosporales</i> sp.         | <i>Cochliobolus kusanoi</i>          | sediment               | North Sea |
| KM096347 | MF549 | <i>Pleosporales</i> sp.         | <i>Cochliobolus kusanoi</i>          | sediment               | North Sea |
| KM096348 | MF550 | <i>Pleosporales</i> sp.         | <i>Cochliobolus kusanoi</i>          | sediment               | North Sea |
| KM096349 | MF551 | <i>Pleosporales</i> sp.         | <i>Cochliobolus kusanoi</i>          | sediment               | North Sea |
| KM096350 | MF552 | <i>Pleosporales</i> sp.         | <i>Cochliobolus kusanoi</i>          | sediment               | North Sea |
| KM096351 | MF553 | <i>Pleosporales</i> sp.         | <i>Cochliobolus kusanoi</i>          | sediment               | North Sea |
| KM096352 | MF554 | <i>Tetracladium</i> sp.         | Uncultured Ascomycota clone Pa2007C1 | sediment               | North Sea |
| KM096353 | MF555 | <i>Penicillium</i> sp.          | <i>Penicillium tardum</i>            | sediment               | North Sea |
| KM096354 | MF557 | <i>Aspergillus versicolor</i>   | <i>Aspergillus versicolor</i>        | sediment               | North Sea |
| KM096355 | MF560 | <i>Paraphaeosphaeria</i> sp.    | <i>Paraphaeosphaeria</i> sp. E5-3C   | sediment               | North Sea |
| KM096356 | MF563 | <i>Nectriaceae</i> sp.          | <i>Gibberella fujikuroi</i>          | sediment               | North Sea |
| KM096357 | MF564 | <i>Chaetomium globosum</i>      | <i>Chaetomium globosum</i>           | sediment               | North Sea |
| KM096358 | MF565 | <i>Pleosporales</i> sp.         | <i>Phoma herbarum</i>                | sediment               | North Sea |
| KM096359 | MF568 | <i>Nectriaceae</i> sp.          | <i>Gibberella fujikuroi</i>          | sediment               | North Sea |
| KM096360 | MF569 | <i>Geomyces</i> sp.             | <i>Geomyces</i> sp. WNF-15A          | sediment               | North Sea |
| KM096361 | MF570 | <i>Doratomyces stemonitis</i>   | <i>Doratomyces stemonitis</i>        | sediment               | North Sea |
| KM096362 | MF571 | <i>Cladosporium</i> sp.         | <i>Cladosporium</i> sp. CF-25        | sediment               | North Sea |
| KM096363 | MF572 | <i>Microascus cirrosus</i>      | <i>Microascus cirrosus</i>           | sediment               | North Sea |
| KM096364 | MF573 | <i>Chaetomium elatum</i>        | <i>Chaetomium elatum</i>             | sediment               | North Sea |
| KM096365 | MF574 | <i>Penicillium</i> sp.          | <i>Eupenicillium javanicum</i>       | sediment               | North Sea |
| KM096366 | MF575 | <i>Chaetomium elatum</i>        | <i>Chaetomium elatum</i>             | sediment               | North Sea |
| KM096367 | MF577 | <i>Microdochium nivale</i>      | <i>Microdochium nivale</i>           | sediment               | North Sea |
| KM096368 | MF580 | <i>Helotiales</i> sp.           | <i>Leptodontidium orchidicola</i>    | sediment               | North Sea |
| KM096369 | MF581 | <i>Geomyces</i> sp.             | <i>Geomyces</i> sp. P7               | sediment               | North Sea |
| KM096370 | MF584 | <i>Geomyces</i> sp.             | <i>Geomyces</i> sp. P7               | sediment               | North Sea |
| KM096371 | MF607 | <i>Trichosporon laibachii</i>   | <i>Trichosporon laibachii</i>        | plant/algae-associated | China Sea |
| KM096372 | MF608 | <i>Pleosporales</i> sp.         | <i>Phoma herbarum</i>                | plant/algae-associated | China Sea |
| KM096373 | MF609 | <i>Penicillium verruculosum</i> | <i>Penicillium purpurogenum</i>      | plant/algae-associated | China Sea |
| KM096374 | MF610 | <i>Pleosporales</i> sp.         | <i>Phoma herbarum</i>                | plant/algae-associated | China Sea |

Abbreviation: No information available, na
