# Supplementary material for: Identification of Habitat-Specific Biomes of Aquatic Fungal Communities Using a Comprehensive Nearly Full-Length 18S rRNA Dataset Enriched with Contextual Data
Source: PubMed Central journal article supplement (PMC4520555; doi:10.1371/journal.pone.0134377), 2015-07-30
Supplement: pone.0134377.s004.pdf [file pone.0134377.s004.pdf]

**Supplementary Table S2: New taxonomic assignment of sequences of basal fungal lineages.** Fungal sequences were subjected to BLAST-N analysis and checked for their taxonomic placement in the eukaryotic guide-tree of the SILVA release 111. Sequences were classified depending on combined results from the methods mentioned above as well as literature searches.

| Accession number | Name                         | New classification based on combined results | Clustering of the sequence in the eukaryotic guide tree of SILVA | Best BLAST-N hit Name           | Accession number | E.value | Identity |
|------------------|------------------------------|----------------------------------------------|------------------------------------------------------------------|---------------------------------|------------------|---------|----------|
| AB191431         | Uncultured fungus            | <i>Chytridiomycota</i>                       | <i>Chytridiomycota</i>                                           | <i>Basidiobolus haptosporus</i> | AF113413.1       | 0.0     | 91       |
| AB191432         | Uncultured eukaryote         | <i>Blastocladiomycota</i>                    | <i>Blastocladiomycota</i>                                        | <i>Rhizophlyctis rosea</i>      | NG_017175.1      | 0.0     | 91       |
| AB252775         | Uncultured eukaryote         | <i>Chytridiomycota</i>                       | <i>Chytridiomycota</i>                                           | <i>Blastocladiiales sp.</i>     | EF565163.1       | 0.0     | 91       |
| AB252776         | Uncultured eukaryote         | Fungi                                        | Nucleomycea_Fonticula                                            | <i>Rhizophydium sp.</i>         | AF164270.2       | 0.0     | 87       |
| AB252777         | Uncultured eukaryote         | <i>Chytridiomycota</i>                       | <i>Chytridiomycota</i>                                           | <i>Basidiobolus haptosporus</i> | AF113413.1       | 0.0     | 91       |
| AB275063         | Uncultured fungus            | <i>Chytridiomycota</i>                       | <i>Chytridiomycota</i>                                           | <i>Catenomyces sp.</i>          | AY635830.1       | 0.0     | 90       |
| AB275064         | Uncultured fungus            | <i>Chytridiomycota</i>                       | <i>Chytridiomycota</i>                                           | <i>Endogone lactiflua</i>       | DQ536471.1       | 0.0     | 91       |
| AB433328         | <i>Nuclearia thermophila</i> | <i>Nuclearia</i>                             | Nucleomycea_Nuclearia                                            | <i>Nuclearia thermophila</i>    | AB433328.1       | 0.0     | 100      |
| AB468592         | Uncultured fungus            | Basal clone group I                          | <i>Chytridiomycota</i>                                           | <i>Physoderma dulichii</i>      | DQ536472.1       | 0.0     | 90       |
| AB468593         | Uncultured fungus            | Basal clone group I                          | <i>Chytridiomycota</i>                                           | <i>Physoderma dulichii</i>      | DQ536472.1       | 0.0     | 91       |
| AB468594         | Uncultured fungus            | Basal clone group I                          | <i>Chytridiomycota</i>                                           | <i>Urophlyctis pulposa</i>      | HQ888719.1       | 0.0     | 91       |
| AB468595         | Uncultured fungus            | Basal clone group I                          | <i>Chytridiomycota</i>                                           | <i>Physoderma dulichii</i>      | DQ536472.1       | 0.0     | 91       |
| AB468596         | Uncultured fungus            | Basal clone group I                          | <i>Chytridiomycota</i>                                           | <i>Physoderma dulichii</i>      | DQ536472.1       | 0.0     | 91       |
| AB468597         | Uncultured fungus            | Basal clone group I                          | <i>Chytridiomycota</i>                                           | <i>Physoderma dulichii</i>      | DQ536472.1       | 0.0     | 91       |
| AB468598         | Uncultured fungus            | Basal clone group I                          | <i>Chytridiomycota</i>                                           | <i>Physoderma dulichii</i>      | DQ536472.1       | 0.0     | 91       |
| AB468599         | Uncultured fungus            | Basal clone group I                          | <i>Chytridiomycota</i>                                           | <i>Physoderma dulichii</i>      | DQ536472.1       | 0.0     | 91       |
| AB468600         | Uncultured fungus            | Basal clone group I                          | <i>Chytridiomycota</i>                                           | <i>Physoderma dulichii</i>      | DQ536472.1       | 0.0     | 91       |
| AB468601         | Uncultured fungus            | Basal clone group I                          | <i>Chytridiomycota</i>                                           | <i>Urophlyctis pulposa</i>      | HQ888719.1       | 0.0     | 90       |
| AB468602         | Uncultured fungus            | Basal clone group I                          | <i>Chytridiomycota</i>                                           | <i>Physoderma dulichii</i>      | DQ536472.1       | 0.0     | 91       |
| AB468603         | Uncultured fungus            | Basal clone group I                          | <i>Chytridiomycota</i>                                           | <i>Physoderma dulichii</i>      | DQ536472.1       | 0.0     | 91       |
| AB468604         | Uncultured fungus            | Basal clone group I                          | <i>Chytridiomycota</i>                                           | <i>Physoderma dulichii</i>      | DQ536472.1       | 0.0     | 91       |
| AB468605         | Uncultured fungus            | Basal clone group I                          | <i>Chytridiomycota</i>                                           | <i>Physoderma dulichii</i>      | DQ536472.1       | 0.0     | 91       |
| AB468606         | Uncultured fungus            | Basal clone group I                          | <i>Chytridiomycota</i>                                           | <i>Physoderma dulichii</i>      | DQ536472.1       | 0.0     | 91       |
| AB468607         | Uncultured fungus            | Basal clone group I                          | <i>Chytridiomycota</i>                                           | <i>Physoderma dulichii</i>      | DQ536472.1       | 0.0     | 91       |
| AB468608         | Uncultured fungus            | Basal clone group I                          | <i>Chytridiomycota</i>                                           | <i>Physoderma dulichii</i>      | DQ536472.1       | 0.0     | 91       |
| AB468609         | Uncultured fungus            | Basal clone group I                          | <i>Chytridiomycota</i>                                           | <i>Urophlyctis pulposa</i>      | HQ888719.1       | 0.0     | 91       |
| AB468610         | Uncultured fungus            | Basal clone group I                          | <i>Chytridiomycota</i>                                           | <i>Physoderma dulichii</i>      | DQ536472.1       | 0.0     | 91       |
| AB468611         | Uncultured fungus            | Basal clone group I                          | <i>Chytridiomycota</i>                                           | <i>Physoderma dulichii</i>      | DQ536472.1       | 0.0     | 90       |
| AB468612         | Uncultured fungus            | Basal clone group I                          | <i>Chytridiomycota</i>                                           | <i>Physoderma dulichii</i>      | DQ536472.1       | 0.0     | 91       |
| AB468613         | Uncultured fungus            | Basal clone group I                          | <i>Chytridiomycota</i>                                           | <i>Physoderma dulichii</i>      | DQ536472.1       | 0.0     | 90       |
| AB468614         | Uncultured fungus            | Basal clone group I                          | <i>Chytridiomycota</i>                                           | <i>Mortierella wolfii</i>       | AF113425.1       | 0.0     | 91       |
| AB468615         | Uncultured fungus            | Basal clone group I                          | <i>Chytridiomycota</i>                                           | <i>Physoderma dulichii</i>      | DQ536472.1       | 0.0     | 91       |
| AB468616         | Uncultured fungus            | Basal clone group I                          | <i>Chytridiomycota</i>                                           | <i>Physoderma dulichii</i>      | DQ536472.1       | 0.0     | 91       |
| AB468617         | Uncultured fungus            | Basal clone group I                          | <i>Chytridiomycota</i>                                           | <i>Physoderma dulichii</i>      | DQ536472.1       | 0.0     | 91       |
| AB468618         | Uncultured fungus            | Basal clone group I                          | <i>Chytridiomycota</i>                                           | <i>Physoderma dulichii</i>      | DQ536472.1       | 0.0     | 91       |
| AB468619         | Uncultured fungus            | Basal clone group I                          | <i>Chytridiomycota</i>                                           | <i>Physoderma dulichii</i>      | DQ536472.1       | 0.0     | 91       |
| AB468620         | Uncultured fungus            | Basal clone group I                          | <i>Chytridiomycota</i>                                           | <i>Physoderma dulichii</i>      | DQ536472.1       | 0.0     | 90       |
| AB468621         | Uncultured fungus            | Basal clone group I                          | <i>Chytridiomycota</i>                                           | <i>Physoderma dulichii</i>      | DQ536472.1       | 0.0     | 91       |
| AB468622         | Uncultured fungus            | Basal clone group I                          | <i>Chytridiomycota</i>                                           | <i>Physoderma dulichii</i>      | DQ536472.1       | 0.0     | 91       |
| AB468623         | Uncultured fungus            | Basal clone group I                          | <i>Chytridiomycota</i>                                           | <i>Physoderma dulichii</i>      | DQ536472.1       | 0.0     | 91       |
| AB468624         | Uncultured fungus            | Basal clone group I                          | <i>Chytridiomycota</i>                                           | <i>Physoderma dulichii</i>      | DQ536472.1       | 0.0     | 91       |
| AB468625         | Uncultured fungus            | Basal clone group I                          | <i>Chytridiomycota</i>                                           | <i>Physoderma dulichii</i>      | DQ536472.1       | 0.0     | 91       |
| AB468626         | Uncultured fungus            | Basal clone group I                          | <i>Chytridiomycota</i>                                           | <i>Physoderma dulichii</i>      | DQ536472.1       | 0.0     | 91       |
| AB468627         | Uncultured fungus            | Basal clone group I                          | <i>Chytridiomycota</i>                                           | <i>Physoderma dulichii</i>      | DQ536472.1       | 0.0     | 91       |
| AB468628         | Uncultured fungus            | Basal clone group I                          | <i>Chytridiomycota</i>                                           | <i>Rhizophlyctis rosea</i>      | NG_017175.1      | 0.0     | 91       |

|          |                      |                        |                        |                                |             |     |    |
|----------|----------------------|------------------------|------------------------|--------------------------------|-------------|-----|----|
| AB468629 | Uncultured fungus    | Basal clone group I    | <i>Chytridiomycota</i> | <i>Rhizophlyctis rosea</i>     | NG_017175.1 | 0.0 | 91 |
| AB468635 | Uncultured fungus    | Basal clone group I    | <i>Chytridiomycota</i> | <i>Physoderma dulichii</i>     | DQ536472.1  | 0.0 | 91 |
| AB468636 | Uncultured fungus    | Basal clone group I    | <i>Chytridiomycota</i> | <i>Physoderma dulichii</i>     | DQ536472.1  | 0.0 | 91 |
| AB468637 | Uncultured fungus    | Basal clone group I    | <i>Chytridiomycota</i> | <i>Physoderma dulichii</i>     | DQ536472.1  | 0.0 | 91 |
| AB468638 | Uncultured fungus    | Basal clone group I    | <i>Chytridiomycota</i> | <i>Physoderma dulichii</i>     | DQ536472.1  | 0.0 | 91 |
| AB468639 | Uncultured fungus    | Basal clone group I    | <i>Chytridiomycota</i> | <i>Physoderma dulichii</i>     | DQ536472.1  | 0.0 | 90 |
| AB468640 | Uncultured fungus    | Basal clone group I    | <i>Chytridiomycota</i> | <i>Physoderma dulichii</i>     | DQ536472.1  | 0.0 | 91 |
| AB468641 | Uncultured fungus    | Basal clone group I    | <i>Chytridiomycota</i> | <i>Physoderma dulichii</i>     | DQ536472.1  | 0.0 | 91 |
| AB468642 | Uncultured fungus    | Basal clone group I    | <i>Chytridiomycota</i> | <i>Physoderma dulichii</i>     | DQ536472.1  | 0.0 | 90 |
| AB468643 | Uncultured fungus    | Basal clone group I    | <i>Chytridiomycota</i> | <i>Physoderma dulichii</i>     | DQ536472.1  | 0.0 | 90 |
| AB468644 | Uncultured fungus    | Basal clone group I    | <i>Chytridiomycota</i> | <i>Physoderma dulichii</i>     | DQ536472.1  | 0.0 | 91 |
| AB468645 | Uncultured fungus    | Basal clone group I    | <i>Chytridiomycota</i> | <i>Physoderma dulichii</i>     | DQ536472.1  | 0.0 | 91 |
| AB468646 | Uncultured fungus    | Basal clone group I    | <i>Chytridiomycota</i> | <i>Physoderma dulichii</i>     | DQ536472.1  | 0.0 | 90 |
| AB468647 | Uncultured fungus    | Basal clone group I    | <i>Chytridiomycota</i> | <i>Physoderma dulichii</i>     | DQ536472.1  | 0.0 | 91 |
| AB468648 | Uncultured fungus    | Basal clone group I    | <i>Chytridiomycota</i> | <i>Physoderma dulichii</i>     | DQ536472.1  | 0.0 | 91 |
| AB468649 | Uncultured fungus    | Basal clone group I    | <i>Chytridiomycota</i> | <i>Physoderma dulichii</i>     | DQ536472.1  | 0.0 | 91 |
| AB468650 | Uncultured fungus    | Basal clone group I    | <i>Chytridiomycota</i> | <i>Physoderma dulichii</i>     | DQ536472.1  | 0.0 | 91 |
| AB468651 | Uncultured fungus    | Basal clone group I    | <i>Chytridiomycota</i> | <i>Physoderma dulichii</i>     | DQ536472.1  | 0.0 | 91 |
| AB468652 | Uncultured fungus    | Basal clone group I    | <i>Chytridiomycota</i> | <i>Physoderma dulichii</i>     | DQ536472.1  | 0.0 | 91 |
| AB468653 | Uncultured fungus    | Basal clone group I    | <i>Chytridiomycota</i> | <i>Physoderma dulichii</i>     | DQ536472.1  | 0.0 | 91 |
| AB468654 | Uncultured fungus    | Basal clone group I    | <i>Chytridiomycota</i> | <i>Physoderma dulichii</i>     | DQ536472.1  | 0.0 | 91 |
| AB468655 | Uncultured fungus    | Basal clone group I    | <i>Chytridiomycota</i> | <i>Physoderma dulichii</i>     | DQ536472.1  | 0.0 | 91 |
| AB468656 | Uncultured fungus    | Basal clone group I    | <i>Chytridiomycota</i> | <i>Physoderma dulichii</i>     | DQ536472.1  | 0.0 | 91 |
| AB468657 | Uncultured fungus    | Basal clone group I    | <i>Chytridiomycota</i> | <i>Physoderma dulichii</i>     | DQ536472.1  | 0.0 | 91 |
| AB468658 | Uncultured fungus    | Basal clone group I    | <i>Chytridiomycota</i> | <i>Physoderma dulichii</i>     | DQ536472.1  | 0.0 | 91 |
| AB468659 | Uncultured fungus    | Basal clone group I    | <i>Chytridiomycota</i> | <i>Physoderma dulichii</i>     | DQ536472.1  | 0.0 | 90 |
| AB468660 | Uncultured fungus    | Basal clone group I    | <i>Chytridiomycota</i> | <i>Physoderma dulichii</i>     | DQ536472.1  | 0.0 | 91 |
| AB468661 | Uncultured fungus    | Basal clone group I    | <i>Chytridiomycota</i> | <i>Physoderma dulichii</i>     | DQ536472.1  | 0.0 | 91 |
| AB468662 | Uncultured fungus    | Basal clone group I    | <i>Chytridiomycota</i> | <i>Physoderma dulichii</i>     | DQ536472.1  | 0.0 | 91 |
| AB468663 | Uncultured fungus    | Basal clone group I    | <i>Chytridiomycota</i> | <i>Physoderma dulichii</i>     | DQ536472.1  | 0.0 | 91 |
| AB468664 | Uncultured fungus    | Basal clone group I    | <i>Chytridiomycota</i> | <i>Physoderma dulichii</i>     | DQ536472.1  | 0.0 | 90 |
| AB468665 | Uncultured fungus    | Basal clone group I    | <i>Chytridiomycota</i> | <i>Physoderma dulichii</i>     | DQ536472.1  | 0.0 | 91 |
| AB468666 | Uncultured fungus    | Basal clone group I    | <i>Chytridiomycota</i> | <i>Physoderma dulichii</i>     | DQ536472.1  | 0.0 | 91 |
| AB468667 | Uncultured fungus    | Basal clone group I    | <i>Chytridiomycota</i> | <i>Physoderma dulichii</i>     | DQ536472.1  | 0.0 | 91 |
| AB468668 | Uncultured fungus    | Basal clone group I    | <i>Chytridiomycota</i> | <i>Physoderma dulichii</i>     | DQ536472.1  | 0.0 | 91 |
| AB468669 | Uncultured fungus    | Basal clone group I    | <i>Chytridiomycota</i> | <i>Physoderma dulichii</i>     | DQ536472.1  | 0.0 | 91 |
| AB468670 | Uncultured fungus    | Basal clone group I    | <i>Chytridiomycota</i> | <i>Physoderma dulichii</i>     | DQ536472.1  | 0.0 | 91 |
| AB468671 | Uncultured fungus    | Basal clone group I    | <i>Chytridiomycota</i> | <i>Rhizophlyctis rosea</i>     | NG_017175.1 | 0.0 | 91 |
| AB468672 | Uncultured fungus    | <i>Chytridiomycota</i> | <i>Chytridiomycota</i> | <i>Rhizophlyctis harderi</i>   | AF164272.2  | 0.0 | 92 |
| AB468673 | Uncultured fungus    | <i>Chytridiomycota</i> | <i>Chytridiomycota</i> | <i>Rhizophlyctis harderi</i>   | AF164272.2  | 0.0 | 92 |
| AB695460 | Uncultured eukaryote | <i>Cryptomycota</i>    | LKM11                  | Fungal sp.                     | JQ796369.1  | 0.0 | 91 |
| AB695461 | Uncultured eukaryote | LKM15                  | LKM15                  | <i>Hyaloraphidium curvatum</i> | NG_017172.1 | 0.0 | 84 |
| AB695462 | Uncultured eukaryote | LKM15                  | LKM15                  | <i>Lamproderma</i> sp.         | AB779691.1  | 0.0 | 89 |
| AB695463 | Uncultured eukaryote | <i>Cryptomycota</i>    | LKM11                  | <i>Amphora commutata</i>       | AB754836.1  | 0.0 | 83 |
| AB695464 | Uncultured eukaryote | LKM15                  | LKM15                  | <i>Basidioascus undulatus</i>  | JX242890.1  | 0.0 | 85 |
| AB695465 | Uncultured eukaryote | <i>Cryptomycota</i>    | LKM11                  | Fungal sp.                     | JQ796368.1  | 0.0 | 87 |
| AB695466 | Uncultured eukaryote | <i>Cryptomycota</i>    | LKM11                  | <i>Hyaloraphidium curvatum</i> | NG_017172.1 | 0.0 | 89 |
| AB695512 | Uncultured eukaryote | <i>Cryptomycota</i>    | LKM11                  | Fungal sp.                     | JQ796369.1  | 0.0 | 92 |
| AB695514 | Uncultured eukaryote | LKM15                  | LKM15                  | <i>Saitoella complicata</i>    | JQ698935.1  | 0.0 | 87 |
| AB695515 | Uncultured eukaryote | <i>Cryptomycota</i>    | LKM11                  | Fungal sp.                     | JQ796369.1  | 0.0 | 92 |
| AF372712 | Uncultured fungus    | <i>Cryptomycota</i>    | LKM11                  | Fungal sp.                     | JQ796369.1  | 0.0 | 88 |
| AF372713 | Uncultured fungus    | <i>Cryptomycota</i>    | LKM11                  | Fungal sp.                     | JQ796369.1  | 0.0 | 89 |

|          |                                    |                           |                                               |                                          |             |     |    |
|----------|------------------------------------|---------------------------|-----------------------------------------------|------------------------------------------|-------------|-----|----|
| AF372716 | Uncultured fungus                  | <i>Cryptomycota</i>       | LKM11                                         | Fungal sp.                               | JQ796369.1  | 0.0 | 88 |
| AF372717 | Uncultured fungus                  | LKM15                     | LKM15                                         | <i>Lamproderma sp.</i>                   | AB779691.1  | 0.0 | 94 |
| AF372718 | Uncultured fungus                  | LKM15                     | LKM15                                         | <i>Lamproderma sp.</i>                   | AB779691.1  | 0.0 | 94 |
| AJ130849 | Uncultured eukaryote               | <i>Cryptomycota</i>       | LKM11                                         | <i>Hyaloraphidium curvatum</i>           | NG_017172.1 | 0.0 | 89 |
| AJ130850 | Uncultured eukaryote               | LKM15                     | LKM15                                         | <i>Lamproderma sp.</i>                   | AB779691.1  | 0.0 | 99 |
| AJ130857 | Uncultured eukaryote               | <i>Cryptomycota</i>       | LKM11                                         | <i>Saturnispora mendoncae</i>            | EF550352.1  | 0.0 | 81 |
| AY180024 | Uncultured fungus                  | <i>Chytridiomycota</i>    | <i>Chytridiomycota</i>                        | <i>Entophlyctis confervae-glomeratae</i> | EF014367.1  | 0.0 | 90 |
| AY230211 | Uncultured fungus                  | <i>Blastocladiomycota</i> | <i>Blastocladiomycota</i>                     | <i>Zygomycete sp.</i>                    | EU428774.1  | 0.0 | 89 |
| AY642700 | Uncultured eukaryotic Picoplankton | <i>Cryptomycota</i>       | LKM11                                         | <i>Hyaloraphidium curvatum</i>           | NG_017172.1 | 0.0 | 89 |
| AY642711 | Uncultured eukaryotic Picoplankton | <i>Cryptomycota</i>       | LKM11                                         | <i>Saturnispora mendoncae</i>            | EF550352.1  | 0.0 | 82 |
| AY642721 | Uncultured eukaryotic Picoplankton | <i>Cryptomycota</i>       | LKM11                                         | Fungal sp.                               | JQ796369.1  | 0.0 | 85 |
| AY642725 | Uncultured eukaryotic Picoplankton | <i>Cryptomycota</i>       | <i>Chytridiomycota_Incertae Sedis_Rozella</i> | <i>Saturnispora mendoncae</i>            | EF550352.1  | 0.0 | 80 |
| AY642731 | Uncultured eukaryotic Picoplankton | <i>Cryptomycota</i>       | LKM11                                         | <i>Candida sp.</i>                       | GQ176145.1  | 0.0 | 82 |
| AY821991 | Uncultured fungus                  | <i>Cryptomycota</i>       | LKM11                                         | Fungal sp.                               | JQ796369.1  | 0.0 | 86 |
| AY821992 | Uncultured Chytridiomycota         | <i>Blastocladiomycota</i> | <i>Blastocladiomycota</i>                     | <i>Blastocadia ramosa</i>                | HQ888695.1  | 0.0 | 97 |
| AY821995 | Uncultured Chytridiomycota         | <i>Blastocladiomycota</i> | <i>Blastocladiomycota</i>                     | <i>Blastocladia pringsheimii</i>         | HQ888696.1  | 0.0 | 98 |
| AY821997 | Uncultured fungus                  | <i>Cryptomycota</i>       | LKM11                                         | <i>Phaeophleospora eugenicola</i>        | GU214567.1  | 0.0 | 89 |
| DQ244003 | Uncultured fungus                  | <i>Cryptomycota</i>       | <i>Chytridiomycota_Incertae Sedis_Rozella</i> | <i>Rhizophyidium haynaldii</i>           | KF160859.1  | 0.0 | 89 |
| DQ244010 | Uncultured fungus                  | <i>Blastocladiomycota</i> | <i>Blastocladiomycota</i>                     | <i>Porostereum crassum</i>               | AB809163.1  | 0.0 | 88 |
| DQ244011 | Uncultured fungus                  | Fungi                     | Nucleomycea_Fonticula                         | <i>Basidiobolus haptosporus</i>          | AF368504.1  | 0.0 | 89 |
| DQ244015 | Uncultured fungus                  | <i>Blastocladiomycota</i> | <i>Blastocladiomycota</i>                     | <i>Allomyces macrogynus</i>              | U23936.1    | 0.0 | 91 |
| DQ244016 | Uncultured fungus                  | <i>Cryptomycota</i>       | LKM11                                         | <i>Candida lusitanae</i>                 | M55526.1    | 0.0 | 86 |
| DQ244017 | Uncultured fungus                  | <i>Cryptomycota</i>       | LKM11                                         | Fungal sp.                               | JQ796369.1  | 0.0 | 88 |
| DQ244018 | Uncultured fungus                  | <i>Cryptomycota</i>       | LKM11                                         | <i>Candida incommunis</i>                | AB018133.2  | 0.0 | 84 |
| EF100212 | Uncultured eukaryote               | <i>Blastocladiomycota</i> | <i>Blastocladiomycota</i>                     | <i>Mucoromycotina sp.</i>                | JF414208.1  | 0.0 | 92 |
| EF100353 | Uncultured eukaryote               | LKM15                     | LKM15                                         | <i>Lamproderma sp.</i>                   | AB779691.1  | 0.0 | 87 |
| EF100356 | Uncultured eukaryote               | <i>Blastocladiomycota</i> | <i>Blastocladiomycota</i>                     | <i>Mortierella alpina</i>                | AJ271630.1  | 0.0 | 88 |
| EU050974 | Uncultured eukaryote               | <i>Chytridiomycota</i>    | <i>Chytridiomycota</i>                        | <i>Triparticalcar arcticum</i>           | DQ536480.1  | 0.0 | 89 |
| EU091829 | Uncultured ban. Eukaryote          | <i>Cryptomycota</i>       | LKM11                                         | <i>Spizellomyces sp.</i>                 | AB586075.1  | 0.0 | 90 |
| EU091830 | Uncultured ban. Eukaryote          | <i>Chytridiomycota</i>    | <i>Chytridiomycota</i>                        | <i>Rhizophlyctis rosea</i>               | NG_017175.1 | 0.0 | 96 |
| EU091833 | Uncultured Banisveld Eukaryote     | <i>Chytridiomycota</i>    | <i>Chytridiomycota</i>                        | <i>Rhizophlyctis rosea</i>               | NG_017175.1 | 0.0 | 96 |
| EU091835 | Uncultured Banisveld Eukaryote     | <i>Cryptomycota</i>       | LKM11                                         | Fungal sp.                               | JQ796369.1  | 0.0 | 87 |
| EU091838 | Uncultured Banisveld Eukaryote     | <i>Cryptomycota</i>       | LKM11                                         | Fungal sp.                               | JQ796369.1  | 0.0 | 87 |
| EU091850 | Uncultured Banisveld Eukaryote     | <i>Cryptomycota</i>       | LKM11                                         | <i>Candida incommunis</i>                | AB018133.2  | 0.0 | 85 |
| EU091851 | Uncultured Banisveld Eukaryote     | <i>Cryptomycota</i>       | LKM11                                         | <i>Spizellomyces sp.</i>                 | AB586075.1  | 0.0 | 90 |
| EU091852 | Uncultured Banisveld Eukaryote     | <i>Cryptomycota</i>       | LKM11                                         | <i>Spizellomyces sp.</i>                 | AB586075.1  | 0.0 | 88 |
| EU091865 | Uncultured Banisveld Eukaryote     | <i>Cryptomycota</i>       | LKM11                                         | Fungal sp.                               | JQ796369.1  | 0.0 | 93 |
| EU091872 | Uncultured Banisveld Eukaryote     | <i>Cryptomycota</i>       | LKM11                                         | Fungal sp.                               | JQ796369.1  | 0.0 | 86 |
| EU154992 | Marine Uncultured Fungus           | <i>Blastocladiomycota</i> | <i>Chytridiomycota</i>                        | <i>Physoderma dulichii</i>               | DQ536472.1  | 0.0 | 91 |
| EU162634 | Uncultured fungus                  | <i>Cryptomycota</i>       | LKM11                                         | <i>Hyaloraphidium curvatum</i>           | NG_017172.1 | 0.0 | 88 |
| EU162635 | Uncultured fungus                  | <i>Cryptomycota</i>       | LKM11                                         | <i>Basidiobolus microsporus</i>          | AF368505.1  | 0.0 | 87 |
| EU162639 | Uncultured Chytridiomycota         | Basal_fungi               | Basal_fungi                                   | <i>Blastocladales sp.</i>                | EF565163.1  | 0.0 | 85 |
| EU910604 | Uncultured alveolate               | LKM15                     | LKM15                                         | <i>Lamproderma sp.</i>                   | AB779691.1  | 0.0 | 96 |
| EU910606 | Uncultured alveolate               | LKM15                     | LKM15                                         | <i>Lamproderma sp.</i>                   | AB779691.1  | 0.0 | 99 |
| FJ157332 | Uncultured eukaryote               | <i>Chytridiomycota</i>    | <i>Chytridiomycota</i>                        | <i>Spizellomyces sp.</i>                 | AB586075.1  | 0.0 | 92 |
| FJ157335 | Uncultured eukaryote               | <i>Blastocladiomycota</i> | <i>Blastocladiomycota</i>                     | <i>Triparticalcar arcticum</i>           | DQ536480.1  | 0.0 | 89 |
| FJ687268 | Uncultured fungus                  | <i>Cryptomycota</i>       | LKM11                                         | Fungal sp.                               | JQ796369.1  | 0.0 | 90 |
| FJ810604 | Uncultured eukaryote               | <i>Cryptomycota</i>       | LKM11                                         | Fungal sp.                               | JQ796369.1  | 0.0 | 93 |
| FJ810611 | Uncultured eukaryote               | <i>Mucoromycotina</i>     | <i>Mucoromycotina</i>                         | <i>Mortierella sp.</i>                   | AB521052.1  | 0.0 | 99 |
| FJ810613 | Uncultured eukaryote               | <i>Cryptomycota</i>       | LKM11                                         | Fungal sp.                               | JQ796369.1  | 0.0 | 89 |
| FJ810615 | Uncultured eukaryote               | <i>Cryptomycota</i>       | LKM11                                         | Fungal sp.                               | JQ796369.1  | 0.0 | 90 |
| FJ976648 | Uncultured fungus                  | <i>Cryptomycota</i>       | <i>Chytridiomycota_Incertae Sedis_Rozella</i> | <i>Rhizophlyctis rosea</i>               | NG_017175.1 | 0.0 | 91 |

|          |                                   |                              |                                        |                                   |             |     |    |
|----------|-----------------------------------|------------------------------|----------------------------------------|-----------------------------------|-------------|-----|----|
| FJ976649 | Uncultured opisthokont            | <i>Cryptomycota</i>          | LKM11                                  | <i>Rhizophyidium sphaerotheca</i> | AY635823.1  | 0.0 | 88 |
| FJ976650 | Uncultured opisthokont            | <i>Blastocladiomycota</i>    | <i>Blastocladiomycota</i>              | <i>Spizellomyces sp.</i>          | AB586075.1  | 0.0 | 89 |
| FR874399 | Uncultured marine Picoeukaryote   | <i>Cryptomycota</i>          | LKM11                                  | Fungal sp.                        | JQ796369.1  | 0.0 | 93 |
| FR874575 | Uncultured marine Picoeukaryote   | <i>Cryptomycota</i>          | LKM11                                  | Fungal sp.                        | JQ796369.1  | 0.0 | 93 |
| FR874713 | Uncultured marine Picoeukaryote   | <i>Cryptomycota</i>          | LKM11                                  | Fungal sp.                        | JQ796369.1  | 0.0 | 93 |
| FR874714 | Uncultured marine Picoeukaryote   | <i>Cryptomycota</i>          | LKM11                                  | Fungal sp.                        | JQ796369.1  | 0.0 | 93 |
| GQ330607 | Uncultured nucleariidae           | <i>Nuclearia</i>             | Nucleletmycea_Nuclearia                | <i>Nuclearia sp.</i>              | HG530253.1  | 0.0 | 97 |
| GQ330608 | Uncultured nucleariidae           | <i>Nuclearia</i>             | Nucleletmycea_Nuclearia                | <i>Nuclearia simplex</i>          | AF484687.1  | 0.0 | 92 |
| GQ330622 | Uncultured cf. <i>Mortierella</i> | <i>Mucoromycotina</i>        | <i>Mucoromycotina</i>                  | <i>Mortierella parvispora</i>     | AY129549.1  | 0.0 | 99 |
| GQ330623 | Uncultured cf. <i>Umbellopsis</i> | <i>Mucoromycotina</i>        | <i>Mucoromycotina</i>                  | <i>Umbellopsis ramanniana</i>     | NG_017189.1 | 0.0 | 99 |
| GQ330624 | Uncultured cf. <i>Umbellopsis</i> | Basal_fungi                  | Basal_fungi                            | <i>Basidiobolus magnus</i>        | JX242608.1  | 0.0 | 88 |
| GQ330641 | Uncultured eukaryote              | Eukaryote                    | Nucleletmycea_Fonticula                | <i>Cryptosporidium sp.</i>        | AB222185.1  | 0.0 | 85 |
| GU067817 | Uncultured fungus                 | <i>Blastocladiomycota</i>    | <i>Blastocladiomycota</i>              | <i>Triparticalcar arcticum</i>    | DQ536480.1  | 0.0 | 89 |
| GU067910 | Uncultured fungus                 | <i>Blastocladiomycota</i>    | <i>Blastocladiomycota</i>              | <i>Basidiobolus microsporius</i>  | AF368505.1  | 0.0 | 91 |
| GU067912 | Uncultured fungus                 | <i>Blastocladiomycota</i>    | <i>Blastocladiomycota</i>              | <i>Flammulina velutipes</i>       | HQ660197.1  | 0.0 | 84 |
| GU067917 | Uncultured fungus                 | <i>Blastocladiomycota</i>    | <i>Blastocladiomycota</i>              | <i>Hyaloraphidium curvatum</i>    | NG_017172.1 | 0.0 | 89 |
| GU067928 | Uncultured fungus                 | <i>Blastocladiomycota</i>    | <i>Blastocladiomycota</i>              | <i>Triparticalcar arcticum</i>    | DQ536480.1  | 0.0 | 92 |
| GU067958 | Uncultured fungus                 | <i>Blastocladiomycota</i>    | <i>Blastocladiomycota</i>              | <i>Basidiobolus microsporius</i>  | AF368505.1  | 0.0 | 91 |
| GU067976 | Uncultured eukaryote              | <i>Blastocladiomycota</i>    | <i>Blastocladiomycota</i>              | <i>Corioloropsis gallica</i>      | AY336772.1  | 0.0 | 85 |
| GU067982 | Uncultured fungus                 | <i>Cryptomycota</i>          | Chytridiomycota_Incertae Sedis_Rozella | <i>Rhizophyidium elyensis</i>     | DQ536479.1  | 0.0 | 90 |
| HM443426 | Uncultured fungus                 | <i>Chytridiomycota</i>       | <i>Chytridiomycota</i>                 | <i>Basidiobolus haptosporus</i>   | AF113413.1  | 0.0 | 90 |
| HM486975 | Uncultured fungus                 | <i>Chytridiomycota</i>       | <i>Chytridiomycota</i>                 | <i>Olpidium brassicae</i>         | NG_017176.1 | 0.0 | 99 |
| HM486987 | Uncultured fungus                 | LKM15                        | LKM15                                  | <i>Lamproderma sp.</i>            | AB779691.1  | 0.0 | 94 |
| HM486989 | Uncultured fungus                 | <i>Cryptomycota</i>          | LKM11                                  | Fungal sp.                        | JQ796369.1  | 0.0 | 90 |
| HM486990 | Uncultured fungus                 | <i>Cryptomycota</i>          | LKM11                                  | <i>Lamproderma sp.</i>            | AB779691.1  | 0.0 | 92 |
| HM486991 | Uncultured fungus                 | <i>Cryptomycota</i>          | LKM11                                  | Fungal sp.                        | JQ796369.1  | 0.0 | 90 |
| HM486992 | Uncultured fungus                 | <i>Cryptomycota</i>          | LKM11                                  | <i>Endogone aggregata</i>         | JF414195.1  | 0.0 | 90 |
| HM486993 | Uncultured fungus                 | <i>Cryptomycota</i>          | LKM11                                  | <i>Endogone aggregata</i>         | JF414195.1  | 0.0 | 90 |
| HM486994 | Uncultured fungus                 | <i>Cryptomycota</i>          | LKM11                                  | Fungal sp.                        | JQ796369.1  | 0.0 | 90 |
| HM486995 | Uncultured fungus                 | <i>Cryptomycota</i>          | LKM11                                  | <i>Endogone aggregata</i>         | JF414195.1  | 0.0 | 90 |
| HM487005 | Uncultured fungus                 | <i>Chytridiomycota</i>       | <i>Chytridiomycota</i>                 | <i>Rhizophlyctis rosea</i>        | NG_017175.1 | 0.0 | 93 |
| HM487006 | Uncultured fungus                 | LKM15                        | LKM15                                  | <i>Lamproderma sp.</i>            | AB779691.1  | 0.0 | 97 |
| HM487007 | Uncultured fungus                 | LKM15                        | LKM15                                  | <i>Lamproderma sp.</i>            | AB779691.1  | 0.0 | 99 |
| HM487008 | Uncultured fungus                 | LKM15                        | LKM15                                  | <i>Lamproderma sp.</i>            | AB779691.1  | 0.0 | 98 |
| HM487009 | Uncultured fungus                 | LKM15                        | LKM15                                  | <i>Lamproderma sp.</i>            | AB779691.1  | 0.0 | 97 |
| HM487010 | Uncultured fungus                 | LKM15                        | LKM15                                  | <i>Lamproderma sp.</i>            | AB779691.1  | 0.0 | 95 |
| HM487011 | Uncultured fungus                 | LKM15                        | LKM15                                  | <i>Lamproderma sp.</i>            | AB779691.1  | 0.0 | 99 |
| HM487046 | Uncultured fungus                 | LKM15                        | LKM15                                  | <i>Lamproderma sp.</i>            | AB779691.1  | 0.0 | 97 |
| HM487047 | Uncultured fungus                 | LKM15                        | LKM15                                  | <i>Lamproderma sp.</i>            | AB779691.1  | 0.0 | 97 |
| HM487048 | Uncultured fungus                 | <i>Cryptomycota</i>          | LKM11                                  | <i>Endogone aggregata</i>         | JF414195.1  | 0.0 | 90 |
| HM487049 | Uncultured fungus                 | <i>Cryptomycota</i>          | LKM11                                  | Fungal sp.                        | JQ796369.1  | 0.0 | 90 |
| HM487051 | Uncultured fungus                 | <i>Cryptomycota</i>          | LKM11                                  | <i>Spizellomyces sp.</i>          | DQ536490.1  | 0.0 | 90 |
| HM487053 | Uncultured fungus                 | LKM15                        | LKM15                                  | <i>Lamproderma sp.</i>            | AB779691.1  | 0.0 | 99 |
| HQ191302 | Uncultured eukaryote              | <i>Blastocladiomycota</i>    | <i>Blastocladiomycota</i>              | <i>Catenomyces sp.</i>            | AY635830.1  | 0.0 | 91 |
| JN090865 | Uncultured eukaryote              | <i>Blastocladiomycota</i>    | <i>Blastocladiomycota</i>              | <i>Triparticalcar arcticum</i>    | DQ536480.1  | 0.0 | 92 |
| JN090896 | Uncultured eukaryote              | Basal_fungi                  | Basal_fungi                            | <i>Basidiobolus haptosporus</i>   | AF368504.1  | 0.0 | 90 |
| JN090898 | Uncultured eukaryote              | <i>Blastocladiomycota</i>    | <i>Blastocladiomycota</i>              | <i>Triparticalcar arcticum</i>    | DQ536480.1  | 0.0 | 90 |
| JN705518 | Uncultured Microeukaryote         | <i>Entomophthoromycotina</i> | <i>Entomophthoromycotina</i>           | <i>Conidiobolus firmipilleus</i>  | AF368507.1  | 0.0 | 99 |
| JN705541 | Uncultured Microeukaryote         | LKM15                        | LKM15                                  | <i>Lamproderma sp.</i>            | AB779691.1  | 0.0 | 87 |
